# Supplementary material
Source: PubMed Central journal article supplement (PMC6278979)
Supplement: 2018.189977.HOFMANS_SUPPL.pdf [file 2018.189977.HOFMANS_SUPPL.pdf]

**The long non-coding RNA landscape in juvenile myelomonocytic leukemia**

Mattias Hofmans,<sup>1,2</sup> Tim Lammens,<sup>1,3</sup> Hetty H. Helsmoortel,<sup>4</sup> Silvia Bresolin,<sup>5</sup> H el ene Cav e,<sup>6</sup> Christian Flotho,<sup>7</sup> Henrik Hasle,<sup>8</sup> Marry M. van den Heuvel-Eibrink,<sup>9,10</sup> Charlotte Niemeyer,<sup>7</sup> Jan Stary,<sup>11</sup> Nadine Van Roy,<sup>3,4</sup> Pieter Van Vlierberghe,<sup>3,4</sup> Jan Philipp e<sup>2,3</sup> and Barbara De Moerloose<sup>1,3</sup>

<sup>1</sup>Department of Pediatric Hematology-Oncology and Stem Cell Transplantation, Ghent University Hospital, Belgium; <sup>2</sup>Department of Clinical Chemistry, Microbiology and Immunology, Ghent University, Belgium; <sup>3</sup>Cancer Research Institute Ghent, Belgium; <sup>4</sup>Center for Medical Genetics, Ghent University Hospital, Belgium; <sup>5</sup>Department of Women and Child Health, University of Padova, Italy; <sup>6</sup>Department of Genetics, University Hospital of Robert Debr e and Paris-Diderot University, Paris, France; <sup>7</sup>Division of Pediatric Hematology and Oncology, Department of Pediatrics and Adolescent Medicine, University of Freiburg, Germany; <sup>8</sup>Department of Pediatrics, Aarhus University Hospital Skejby, Aarhus, Denmark; <sup>9</sup>Princess M axima Center for Pediatric Oncology, Utrecht, the Netherlands; <sup>10</sup>Dutch Childhood Oncology Group, The Hague, the Netherlands and <sup>11</sup>Department of Pediatric Hematology/ Oncology, Charles University and University Hospital Motol, Prague, Czech Republic

Correspondence: [mattias.hofmans@ugent.be](mailto:mattias.hofmans@ugent.be)  
doi:10.3324/haematol.2018.189977

**Table S1. Patient characteristics: None of the patients carried a germline PTPN11 or CBL mutation and patients were treated with standard of care therapy.**

abbreviations: Del = chromosomal deletion; TRM = transfusion related mortality, HSCT = haematopoietic stem cell transplantation; GF = graft failure; GVH = graft versus host

| Identification | LIN28B | Sex    | Sample source<br>(BM = bone marrow; PB = peripheral blood) | Age at diagnosis<br>(months) | HbF %   | Age-adjusted<br>HbF | Karyotype                                                                          | Mutation | BM blast % | Platelets (x<br>10 <sup>9</sup> /L) | Cause of death                                                     | Survival from<br>diagnosis (OS) |                           | Survival from<br>HSCT (EFS) |        | IncRNA<br>score | IncRNA score category<br>(1 = favorable;<br>2 = unfavorable) |
|----------------|--------|--------|------------------------------------------------------------|------------------------------|---------|---------------------|------------------------------------------------------------------------------------|----------|------------|-------------------------------------|--------------------------------------------------------------------|---------------------------------|---------------------------|-----------------------------|--------|-----------------|--------------------------------------------------------------|
|                |        |        |                                                            |                              |         |                     |                                                                                    |          |            |                                     |                                                                    | (years)                         | Events after HSCT         | (years)                     |        |                 |                                                              |
| B009           | High   | Male   | BM                                                         | 19                           | 50.0    | Elevated            | 46,XY /<br>61,XY,+X,+1+3,+5,+7,+11,+13,+<br>13,+16,+20,+22,+5mar                   | PTPN11   | 9.5        | 8                                   | Relapse                                                            | 0.62                            | Relapse                   | 0.11                        | 2.89   | 2               |                                                              |
| B011           | Low    | Male   | BM                                                         | 22                           | 0.9     | Normal              | 45,XX,-7                                                                           | KRAS     | 8.0        | 72                                  |                                                                    | 10.48                           | No event                  | 10.21                       | -11.84 | 1               |                                                              |
| B013           | Low    | Female | BM                                                         | 15                           | 2.2     | Elevated            | 46,XX                                                                              | KRAS     | 6.0        | 70                                  |                                                                    | 5.58                            | No event                  | 5.19                        | -9.77  | 1               |                                                              |
| B014           | High   | Male   | BM                                                         | 49                           | 36.1    | Elevated            | 46,XY                                                                              | PTPN11   | 3.0        | 29                                  |                                                                    | 5.74                            | No event                  | 5.43                        | -2.28  | 1               |                                                              |
| B034           | High   | Male   | BM                                                         | 36                           | 47.0    | Elevated            | 46,XY                                                                              | KRAS     | 7.2        | 21                                  |                                                                    | 2.28                            | No event                  | 2.09                        | 0.32   | 2               |                                                              |
| B041           | High   | Female | BM                                                         | 17                           | 24.0    | Elevated            | 46,XX                                                                              | PTPN11   | 6.0        | 31                                  |                                                                    | 1.47                            | Relapse<br>(secondary GF) | 0.23                        | -7.24  | 1               |                                                              |
| CZ022          | High   | Male   | No data                                                    | 43                           | 17.1    | Elevated            | 46,XY                                                                              | NF1      | 8.0        | 179                                 | TRM                                                                | 1.28                            | TRM                       | 0.20                        | 9.39   | 2               |                                                              |
| CZ067          | Low    | Male   | No data                                                    | 7                            | No data | No data             | 46,XY                                                                              | Quad neg | 2.4        | 131                                 | TRM                                                                | 0.46                            | TRM                       | 0.13                        | 3.93   | 2               |                                                              |
| CZ076          | High   | Male   | No data                                                    | 25                           | 37.0    | Elevated            | 46,XY                                                                              | KRAS     | 0.0        | 25                                  |                                                                    | 4.12                            | No event                  | 3.98                        | -1.57  | 1               |                                                              |
| D003           | Low    | Female | No data                                                    | 3                            | 48.6    | Elevated            | 46,XX                                                                              | NF1      | 9.0        | 160                                 | Relapse                                                            | 4.41                            | Relapse                   | 0.76                        | 8.95   | 2               |                                                              |
| D102           | High   | Male   | No data                                                    | 45                           | 59.5    | Elevated            | 46,XY                                                                              | NF1      | 13.0       | 103                                 | Progress, no SCT                                                   | 0.79                            | no SCT                    | no SCT                      | 9.28   | 2               |                                                              |
| D123           | High   | Male   | No data                                                    | 26                           | 21.8    | Elevated            | 46,XY                                                                              | PTPN11   | 5.0        | 21                                  | Relapse                                                            | 0.90                            | Relapse                   | 0.37                        | 11.99  | 2               |                                                              |
| D127           | Low    | Male   | No data                                                    | 65                           | 5.9     | Elevated            | 46,XY                                                                              | NF1      | 0.0        | 139                                 | Relapse                                                            | 1.82                            | Relapse                   | 0.49                        | 4.10   | 2               |                                                              |
| D311           | High   | Male   | No data                                                    | 35                           | 51.9    | Elevated            | 46,XY                                                                              | Quad neg | 5.0        | 146                                 | Relapse (TRM after 2nd SCT)                                        | 2.27                            | Relapse                   | 1.44                        | 12.51  | 2               |                                                              |
| D360           | High   | Male   | No data                                                    | 64                           | No data | No data             | 45,XY,-21                                                                          | KRAS     | 1.0        | 21                                  | Progress, no SCT                                                   | 0.51                            | no SCT                    | no SCT                      | 12.15  | 2               |                                                              |
| D368           | Low    | Male   | No data                                                    | 8                            | 11.1    | Elevated            | 46,XY                                                                              | PTPN11   | 5.0        | 106                                 | TRM                                                                | 5.36                            | TRM                       | 5.12                        | 8.04   | 2               |                                                              |
| D397           | High   | Male   | No data                                                    | 73                           | 70.0    | Elevated            | 46,XY                                                                              | NRAS     | 6.0        | 40                                  | GF (TRM after 2nd SCT)                                             | 0.69                            | TRM                       | 0.11                        | 17.49  | 2               |                                                              |
| F1             | High   | Female | BM                                                         | 54                           | 5.6     | Elevated            | 47,XX,+21[10] / 46,XX[23]                                                          | PTPN11   | 7.0        | 98                                  | Articular GVH, death due to<br>septic shock after surgery          | 4.84                            | TRM                       | 4.22                        | 1.26   | 2               |                                                              |
| F10            | Low    | Female | PB                                                         | 159                          | 0.2     | Normal              | 45,XX,-7                                                                           | NRAS     | 18.0       | 180                                 |                                                                    | 2.03                            | No event                  | 1.89                        | -0.86  | 1               |                                                              |
| F11            | Low    | Male   | BM                                                         | 50                           | No data | No data             | 46,XY                                                                              | NRAS     | 17.0       | 63                                  |                                                                    | 4.20                            | No event                  | 3.81                        | -15.31 | 1               |                                                              |
| F12            | Low    | Female | PB                                                         | 8                            | 0.3     | Normal              | 45,XX,-7[30] / 46,XX[1]                                                            | KRAS     | 0.0        | 58                                  |                                                                    | 5.38                            | No event                  | 4.77                        | -3.72  | 1               |                                                              |
| F13            | High   | Male   | PB                                                         | 40                           | 69.5    | Elevated            | 46,XY                                                                              | NRAS     | 19.0       | 34                                  | SCT complication                                                   | 0.60                            | TRM                       | 0.24                        | 15.31  | 2               |                                                              |
| F14            | Low    | Male   | BM                                                         | 36                           | No data | Normal              | 46,XY                                                                              | KRAS     | 3.0        | 63                                  |                                                                    | 4.40                            | No event                  | 3.19                        | -1.82  | 1               |                                                              |
| F15            | High   | Female | PB                                                         | 34                           | 31.8    | Elevated            | Del(6)                                                                             | NRAS     | 37.0       | 72                                  |                                                                    | 3.13                            | No event                  | 2.91                        | -1.62  | 1               |                                                              |
| F16            | High   | Female | BM                                                         | 54                           | 58.5    | Elevated            | Del(7)                                                                             | NRAS     | 15.0       | 197                                 | Disease progression and<br>respiratory failure                     | 1.57                            | Relapse                   | 0.18                        | -1.46  | 1               |                                                              |
| F17            | Low    | Male   | BM                                                         | 62                           | 0.4     | Elevated            | 46,XY                                                                              | NRAS     | 3.0        | 84                                  |                                                                    | 6.50                            | no SCT                    | no SCT                      | -3.37  | 1               |                                                              |
| F25            | Low    | Male   | BM                                                         | 1                            | 31.9    | Normal              | 46,XY                                                                              | PTPN11   | 6.0        | 80                                  |                                                                    | 2.93                            | No event                  | 2.16                        | -4.15  | 1               |                                                              |
| F26            | High   | Male   | BM                                                         | 3                            | 36.0    | Elevated            | 46,XY                                                                              | PTPN11   | 0.0        | 33                                  |                                                                    | 0.79                            | No event                  | 0.36                        | -5.77  | 1               |                                                              |
| F27            | High   | Male   | PB                                                         | 23                           | 26.9    | Elevated            | 46,XY                                                                              | PTPN11   | 4.5        | 50                                  |                                                                    | 1.68                            | No event                  | 1.29                        | -4.16  | 1               |                                                              |
| F3             | High   | Male   | BM                                                         | 26                           | 37.4    | Elevated            | 46,XY[15] / 45,X,-Y[12]                                                            | PTPN11   | 11.0       | 46                                  | Toxicity (severe veino occlusive<br>disease after HSCT)            | 0.38                            | TRM                       | 0.09                        | 12.22  | 2               |                                                              |
| F33            | High   | Male   | BM                                                         | 34                           | 40.8    | Elevated            | 46,XY                                                                              | PTPN11   | 3.5        | 26                                  |                                                                    | 3.41                            | No event                  | 3.17                        | -9.65  | 1               |                                                              |
| F34            | Low    | Male   | BM                                                         | 19                           | No data | No data             | Del(13)                                                                            | NRAS     | 3.0        | 217                                 |                                                                    | 3.12                            | No event                  | 2.37                        | -9.61  | 1               |                                                              |
| F35            | High   | Female | PB                                                         | 9                            | 24.9    | Elevated            | 46,XX                                                                              | PTPN11   | 5.0        | 75                                  |                                                                    | 5.45                            | No event                  | 5.02                        | -10.05 | 1               |                                                              |
| F4             | High   | Male   | BM                                                         | 26                           | No data | No data             | 46,XY,del9(q21q32)[10] /<br>48,idem,+21,+22 [1] /<br>48,XY,+21,+22 [3] / 46,XY[16] | PTPN11   | 32.0       | 52                                  | Disease progression<br>(acutisation, relapse after<br>second HSCT) | 2.06                            | Relapse                   | 0.62                        | 2.01   | 2               |                                                              |
| F5             | Low    | Female | BM                                                         | 8                            | 7.4     | Elevated            | Normal                                                                             | PTPN11   | 7.0        | 79                                  |                                                                    | 4.33                            | No event                  | 3.79                        | 5.21   | 2               |                                                              |
| F9             | High   | Male   | BM                                                         | 23                           | 37.0    | Elevated            | Normal                                                                             | PTPN11   | 3.5        | 25                                  |                                                                    | 1.69                            | No event                  | 1.32                        | -0.58  | 2               |                                                              |
| NL043          | High   | Male   | No data                                                    | 39                           | 35.0    | Elevated            | Normal                                                                             | PTPN11   | 2.0        | 66                                  |                                                                    | 15.10                           | Relapse                   | 0.82                        | -4.28  | 1               |                                                              |
| NL072          | High   | Male   | No data                                                    | 10                           | 1.2     | Normal              | 45,XY,-7                                                                           | PTPN11   | 12.0       | 23                                  | Relapse                                                            | 1.27                            | Relapse                   | 0.13                        | 1.86   | 2               |                                                              |
| NL079          | Low    | Male   | BM                                                         | 21                           | 4.4     | Elevated            | Normal                                                                             | KRAS     | 1.4        | 121                                 | GF (GF 2nd SCT)                                                    | 0.82                            | TRM                       | 0.11                        | 15.36  | 2               |                                                              |
| NL094          | High   | Female | BM                                                         | 13                           | No data | No data             | Normal                                                                             | PTPN11   | 9.0        | No data                             | TRM                                                                | 4.30                            | TRM                       | 4.10                        | -1.38  | 1               |                                                              |
| NL105          | Low    | Male   | PB                                                         | 2                            | 43.8    | Normal              | Normal                                                                             | KRAS     | 2.0        | 31                                  |                                                                    | 6.32                            | No event                  | 6.01                        | -0.90  | 1               |                                                              |
| NL109          | Low    | Female | BM                                                         | 17                           | 4.3     | Elevated            | 45,XX,-7[10]                                                                       | Quad neg | 18.0       | 204                                 |                                                                    | 7.21                            | No event                  | 6.51                        | -2.14  | 1               |                                                              |
| NL118          | Low    | Male   | BM                                                         | 6                            | 1.0     | Normal              | 45,XY,-7[10]                                                                       | KRAS     | 1.0        | 30                                  | Progress, no SCT                                                   | 0.06                            | no SCT                    | no SCT                      | 11.93  | 2               |                                                              |
| NL162          | Low    | Male   | BM                                                         | 2                            | 67.4    | Elevated            | 45,XY,-7[10]                                                                       | KRAS     | 4.8        | No data                             |                                                                    | 1.27                            | no SCT                    | no SCT                      | 3.00   | 2               |                                                              |

**Table S2. Differential expressed lncRNAs between JMML and Healthy donors**

|    | Probe_Name             | Gene_Name              | Transcript               | Mean log expression in JMML | Sample Variance in JMML | Mean log expression in Healthy donors | Sample variance in Healthy donors | Fold change | adjusted P value |
|----|------------------------|------------------------|--------------------------|-----------------------------|-------------------------|---------------------------------------|-----------------------------------|-------------|------------------|
| 1  | CUST_13579_PI427704219 | lnc-THADA-4            | lnc-THADA-4:1            | 8.05                        | 2.75                    | 4.93                                  | 2.00                              | 8.66        | 2.4272E-05       |
| 2  | CUST_1933_PI427704219  | lnc-SYF2-2             | lnc-SYF2-2:1             | 5.76                        | 3.40                    | 3.08                                  | 2.14                              | 6.43        | 2.0003E-04       |
| 3  | CUST_7375_PI427704219  | lnc-THADA-4            | lnc-THADA-4:3            | 7.48                        | 2.05                    | 5.10                                  | 0.91                              | 5.21        | 1.8413E-05       |
| 4  | CUST_22045_PI427704219 | lnc-BASP1-3            | lnc-BASP1-3:6            | 6.29                        | 2.12                    | 4.21                                  | 0.21                              | 4.25        | 8.3696E-07       |
| 5  | CUST_19945_PI427704219 | lnc-ACSL1-1            | lnc-ACSL1-1:4            | 6.26                        | 2.34                    | 4.18                                  | 0.25                              | 4.23        | 2.9294E-06       |
| 6  | CUST_17851_PI427704219 | lnc-CROCC-1            | lnc-CROCC-1:4            | 8.40                        | 1.24                    | 6.42                                  | 0.25                              | 3.93        | 0.0000E+00       |
| 7  | CUST_9462_PI427704219  | lnc-ERICH1-5           | lnc-ERICH1-5:1           | 9.43                        | 1.29                    | 7.53                                  | 0.29                              | 3.74        | 2.9294E-06       |
| 8  | CUST_2816_PI427704219  | lnc-MARCH7-1           | lnc-MARCH7-1:1           | 10.20                       | 1.10                    | 8.48                                  | 0.29                              | 3.29        | 6.6957E-06       |
| 9  | CUST_9937_PI427704219  | lnc-EDAR-2             | lnc-EDAR-2:1             | 5.55                        | 1.42                    | 3.96                                  | 0.61                              | 3.02        | 2.0296E-04       |
| 10 | CUST_8873_PI427704219  | lnc-C1orf185-2         | lnc-C1orf185-2:1         | 7.03                        | 0.63                    | 5.73                                  | 0.29                              | 2.46        | 5.7750E-05       |
| 11 | CUST_11806_PI427704219 | lnc-ACSL1-1            | lnc-ACSL1-1:3            | 5.43                        | 0.84                    | 4.21                                  | 0.16                              | 2.33        | 3.3060E-05       |
| 12 | CUST_14702_PI427704219 | lnc-KB-1507C5.2.1-3    | lnc-KB-1507C5.2.1-3:5    | 6.52                        | 0.51                    | 5.39                                  | 0.14                              | 2.19        | 2.5527E-05       |
| 13 | CUST_18666_PI427704219 | lnc-GTF2F2-2           | lnc-GTF2F2-2:14          | 8.39                        | 0.32                    | 7.27                                  | 0.47                              | 2.17        | 8.0348E-04       |
| 14 | CUST_14760_PI427704219 | lnc-MAP7D2-1           | lnc-MAP7D2-1:1           | 6.41                        | 0.34                    | 5.36                                  | 0.10                              | 2.07        | 1.2973E-05       |
| 15 | CUST_10169_PI427704219 | lnc-CCNI-1             | lnc-CCNI-1:1             | 4.66                        | 0.15                    | 3.91                                  | 0.12                              | 1.69        | 2.9126E-04       |
| 16 | CUST_21560_PI427704219 | lnc-ZNF248-1           | lnc-ZNF248-1:3           | 3.93                        | 0.15                    | 4.52                                  | 0.11                              | 0.71        | 2.1271E-03       |
| 17 | CUST_1275_PI427704219  | lnc-ZNF507-3           | lnc-ZNF507-3:1           | 3.50                        | 0.23                    | 4.12                                  | 0.11                              | 0.69        | 1.5731E-03       |
| 18 | CUST_5485_PI427704219  | lnc-FGF10-1            | lnc-FGF10-1:1            | 4.01                        | 0.21                    | 4.66                                  | 0.15                              | 0.68        | 2.6846E-03       |
| 19 | CUST_5751_PI427704219  | lnc-SPATC1-1           | lnc-SPATC1-1:1           | 4.24                        | 0.16                    | 4.89                                  | 0.14                              | 0.68        | 1.8459E-03       |
| 20 | A_33_P3316088          | lnc-BTF3L4-2           | lnc-BTF3L4-2:1           | 4.46                        | 0.17                    | 5.11                                  | 0.07                              | 0.68        | 3.6324E-04       |
| 21 | CUST_17568_PI427704219 | lnc-DLGAP2-2           | lnc-DLGAP2-2:1           | 4.35                        | 0.16                    | 5.01                                  | 0.07                              | 0.67        | 3.1888E-04       |
| 22 | CUST_12736_PI427704219 | lnc-TSN-1              | lnc-TSN-1:3              | 5.18                        | 0.20                    | 5.84                                  | 0.31                              | 0.67        | 1.0580E-02       |
| 23 | CUST_7609_PI427704219  | lnc-CD276-2            | lnc-CD276-2:7            | 4.62                        | 0.18                    | 5.32                                  | 0.14                              | 0.65        | 9.4032E-04       |
| 24 | CUST_1941_PI427704219  | lnc-LRRC4C-1           | lnc-LRRC4C-1:2           | 3.60                        | 0.31                    | 4.32                                  | 0.32                              | 0.65        | 7.5205E-03       |
| 25 | A_33_P3282364          | lnc-RBP5-1             | lnc-RBP5-1:1             | 5.10                        | 0.20                    | 5.82                                  | 0.50                              | 0.65        | 1.7627E-02       |
| 26 | CUST_9925_PI427704219  | lnc-DHFR-2             | lnc-DHFR-2:6             | 3.52                        | 0.28                    | 4.25                                  | 0.17                              | 0.65        | 1.5362E-03       |
| 27 | CUST_15321_PI427704219 | lnc-RP11-1277H1.1.1-4  | lnc-RP11-1277H1.1.1-4:1  | 3.53                        | 0.27                    | 4.26                                  | 0.18                              | 0.64        | 1.7618E-03       |
| 28 | CUST_18358_PI427704219 | lnc-CIT-1              | lnc-CIT-1:4              | 5.46                        | 0.24                    | 6.22                                  | 0.14                              | 0.63        | 6.0387E-04       |
| 29 | CUST_12914_PI427704219 | lnc-SCIMP-1            | lnc-SCIMP-1:1            | 3.45                        | 0.30                    | 4.22                                  | 0.52                              | 0.63        | 1.3928E-02       |
| 30 | CUST_20874_PI427704219 | lnc-DCT-1              | lnc-DCT-1:1              | 4.24                        | 0.35                    | 5.01                                  | 0.20                              | 0.62        | 1.7103E-03       |
| 31 | CUST_21717_PI427704219 | lnc-C6orf58-1          | lnc-C6orf58-1:1          | 3.69                        | 0.37                    | 4.47                                  | 0.09                              | 0.62        | 3.1804E-04       |
| 32 | CUST_3873_PI427704219  | lnc-ZEB2-2             | lnc-ZEB2-2:1             | 3.65                        | 0.23                    | 4.43                                  | 0.22                              | 0.62        | 1.4839E-03       |
| 33 | CUST_758_PI427704219   | lnc-ASB15-1            | lnc-ASB15-1:1            | 3.83                        | 0.21                    | 4.61                                  | 0.32                              | 0.62        | 4.0781E-03       |
| 34 | CUST_10969_PI427704219 | lnc-C2CD4A-5           | lnc-C2CD4A-5:4           | 3.98                        | 0.28                    | 4.76                                  | 0.10                              | 0.62        | 2.1552E-04       |
| 35 | CUST_17186_PI427704219 | lnc-STK32C-1           | lnc-STK32C-1:2           | 4.89                        | 0.25                    | 5.67                                  | 1.07                              | 0.62        | 4.9652E-02       |
| 36 | CUST_17846_PI427704219 | lnc-YTHDF1-4           | lnc-YTHDF1-4:1           | 4.99                        | 0.18                    | 5.78                                  | 0.32                              | 0.62        | 3.6395E-03       |
| 37 | A_33_P3299665          | lnc-FTSJD2-1           | lnc-FTSJD2-1:1           | 5.66                        | 0.18                    | 6.45                                  | 0.14                              | 0.62        | 3.5445E-04       |
| 38 | CUST_603_PI427704219   | lnc-HDDC3-1            | lnc-HDDC3-1:1            | 5.19                        | 0.26                    | 5.99                                  | 0.86                              | 0.61        | 3.1541E-02       |
| 39 | CUST_258_PI427704219   | lnc-DHRS7-1            | lnc-DHRS7-1:3            | 4.34                        | 0.33                    | 5.15                                  | 0.06                              | 0.61        | 6.4446E-05       |
| 40 | CUST_15174_PI427704219 | lnc-ARHGAP10-1         | lnc-ARHGAP10-1:1         | 4.60                        | 0.33                    | 5.41                                  | 0.21                              | 0.61        | 1.2345E-03       |
| 41 | CUST_1688_PI427704219  | lnc-FAM19A5-1          | lnc-FAM19A5-1:1          | 3.66                        | 0.28                    | 4.47                                  | 0.23                              | 0.61        | 1.4270E-03       |
| 42 | CUST_22286_PI427704219 | lnc-RTN4IP1-1          | lnc-RTN4IP1-1:2          | 3.72                        | 0.38                    | 4.54                                  | 0.50                              | 0.60        | 9.5234E-03       |
| 43 | CUST_389_PI427704219   | lnc-C13orf44-1         | lnc-C13orf44-1:3         | 3.76                        | 0.29                    | 4.59                                  | 0.96                              | 0.60        | 3.1984E-02       |
| 44 | CUST_5175_PI427704219  | lnc-ANKRD33-1          | lnc-ANKRD33-1:1          | 5.73                        | 0.29                    | 6.57                                  | 0.79                              | 0.60        | 2.1810E-02       |
| 45 | CUST_4453_PI427704219  | lnc-DYNLRB2-3          | lnc-DYNLRB2-3:3          | 3.57                        | 0.29                    | 4.41                                  | 0.51                              | 0.60        | 8.2135E-03       |
| 46 | CUST_5224_PI427704219  | lnc-C2Oorf78-5         | lnc-C2Oorf78-5:1         | 5.85                        | 0.27                    | 6.69                                  | 0.17                              | 0.59        | 4.3313E-04       |
| 47 | CUST_1566_PI427704219  | lnc-BMP3-1             | lnc-BMP3-1:2             | 4.66                        | 0.27                    | 5.51                                  | 0.30                              | 0.59        | 2.0619E-03       |
| 48 | CUST_13637_PI427704219 | lnc-ZNF74-2            | lnc-ZNF74-2:1            | 4.33                        | 0.29                    | 5.17                                  | 0.87                              | 0.59        | 2.4861E-02       |
| 49 | CUST_1161_PI427704219  | lnc-PDCD6IP-2          | lnc-PDCD6IP-2:6          | 3.18                        | 0.38                    | 4.03                                  | 0.14                              | 0.59        | 3.1428E-04       |
| 50 | CUST_12106_PI427704219 | lnc-EXD2-1             | lnc-EXD2-1:1             | 5.76                        | 0.21                    | 6.62                                  | 0.48                              | 0.59        | 6.0429E-03       |
| 51 | CUST_2383_PI427704219  | lnc-COMMD1-1           | lnc-COMMD1-1:1           | 4.24                        | 0.26                    | 5.09                                  | 1.03                              | 0.59        | 3.2683E-02       |
| 52 | CUST_3987_PI427704219  | lnc-DHX37-10           | lnc-DHX37-10:20          | 4.12                        | 0.27                    | 4.97                                  | 0.59                              | 0.59        | 9.9925E-03       |
| 53 | CUST_3390_PI427704219  | lnc-RP11-82110.1.1-11  | lnc-RP11-82110.1.1-11:2  | 4.02                        | 0.28                    | 4.87                                  | 0.58                              | 0.59        | 9.4861E-03       |
| 54 | CUST_1206_PI427704219  | lnc-SYCP2-1            | lnc-SYCP2-1:1            | 4.03                        | 0.25                    | 4.89                                  | 1.05                              | 0.59        | 3.2612E-02       |
| 55 | CUST_229_PI427704219   | lnc-FOXA2-6            | lnc-FOXA2-6:1            | 5.15                        | 0.31                    | 6.02                                  | 0.36                              | 0.58        | 2.9047E-03       |
| 56 | A_33_P3250555          | lnc-LINC00470-1        | lnc-LINC00470-1:11       | 4.74                        | 0.33                    | 5.61                                  | 0.37                              | 0.58        | 3.0721E-03       |
| 57 | CUST_17803_PI427704219 | lnc-HSP90AA1-9         | lnc-HSP90AA1-9:9         | 4.95                        | 0.30                    | 5.83                                  | 0.65                              | 0.58        | 1.1078E-02       |
| 58 | CUST_7140_PI427704219  | lnc-FAM153B-1          | lnc-FAM153B-1:1          | 3.99                        | 0.47                    | 4.87                                  | 0.21                              | 0.58        | 8.1311E-04       |
| 59 | CUST_14798_PI427704219 | lnc-POLR2B-1           | lnc-POLR2B-1:6           | 3.31                        | 0.27                    | 4.20                                  | 0.74                              | 0.58        | 1.3815E-02       |
| 60 | CUST_11316_PI427704219 | lnc-FAM131B-1          | lnc-FAM131B-1:2          | 4.85                        | 0.37                    | 5.73                                  | 0.44                              | 0.57        | 4.0965E-03       |
| 61 | CUST_17192_PI427704219 | lnc-SLITRK6-12         | lnc-SLITRK6-12:2         | 4.94                        | 0.36                    | 5.83                                  | 0.97                              | 0.57        | 2.4585E-02       |
| 62 | CUST_15799_PI427704219 | lnc-CPEB2-2            | lnc-CPEB2-2:2            | 3.56                        | 0.39                    | 4.45                                  | 0.17                              | 0.57        | 3.7328E-04       |
| 63 | CUST_11315_PI427704219 | lnc-RP11-1070N10.3.1-1 | lnc-RP11-1070N10.3.1-1:6 | 5.11                        | 0.32                    | 6.01                                  | 0.47                              | 0.57        | 4.6087E-03       |
| 64 | CUST_3132_PI427704219  | lnc-ANKRD10-4          | lnc-ANKRD10-4:1          | 5.22                        | 0.42                    | 6.11                                  | 0.27                              | 0.57        | 1.2165E-03       |
| 65 | CUST_17787_PI427704219 | lnc-C6orf99-1          | lnc-C6orf99-1:1          | 4.12                        | 0.21                    | 5.01                                  | 1.04                              | 0.57        | 2.5779E-02       |
| 66 | CUST_15240_PI427704219 | lnc-FAM153A-1          | lnc-FAM153A-1:1          | 4.04                        | 0.38                    | 4.94                                  | 0.20                              | 0.57        | 4.6702E-04       |
| 67 | CUST_12246_PI427704219 | lnc-CBLB-7             | lnc-CBLB-7:1             | 4.51                        | 0.10                    | 5.41                                  | 1.19                              | 0.57        | 3.2021E-02       |
| 68 | CUST_10327_PI427704219 | lnc-RGS7-1             | lnc-RGS7-1:2             | 3.63                        | 0.28                    | 4.53                                  | 1.12                              | 0.57        | 2.9238E-02       |
| 69 | CUST_20080_PI427704219 | lnc-C14orf177-3        | lnc-C14orf177-3:2        | 4.13                        | 0.39                    | 5.03                                  | 0.42                              | 0.57        | 3.2972E-03       |
| 70 | CUST_5421_PI427704219  | lnc-C1QTNF8-3          | lnc-C1QTNF8-3:3          | 4.97                        | 0.21                    | 5.88                                  | 0.76                              | 0.57        | 1.2555E-02       |
| 71 | CUST_580_PI427704219   | lnc-FAM54A-2           | lnc-FAM54A-2:2           | 3.26                        | 0.27                    | 4.18                                  | 0.97                              | 0.56        | 1.9574E-02       |
| 72 | CUST_2008_PI427704219  | lnc-SDIM1-1            | lnc-SDIM1-1:1            | 4.25                        | 0.31                    | 5.18                                  | 1.43                              | 0.56        | 4.0142E-02       |
| 73 | CUST_11969_PI427704219 | lnc-ABCC4-1            | lnc-ABCC4-1:1            | 3.29                        | 0.37                    | 4.23                                  | 1.26                              | 0.56        | 3.1978E-02       |
| 74 | CUST_11665_PI427704219 | lnc-MYOC-2             | lnc-MYOC-2:1             | 3.63                        | 0.48                    | 4.57                                  | 0.25                              | 0.55        | 6.7417E-04       |
| 75 | CUST_19653_PI427704219 | lnc-FAM150B-1          | lnc-FAM150B-1:1          | 4.94                        | 0.35                    | 5.88                                  | 0.10                              | 0.55        | 3.8082E-05       |
| 76 | CUST_20244_PI427704219 | lnc-HBEGF-1            | lnc-HBEGF-1:1            | 5.26                        | 0.25                    | 6.21                                  | 0.46                              | 0.55        | 2.6431E-03       |
| 77 | CUST_424_PI427704219   | lnc-SYK-5              | lnc-SYK-5:2              | 4.83                        | 0.14                    | 5.79                                  | 0.63                              | 0.55        | 5.3724E-03       |
| 78 | CUST_2234_PI427704219  | lnc-RP11-204N11.1.1-3  | lnc-RP11-204N11.1.1-3:10 | 4.07                        | 0.43                    | 5.04                                  | 0.20                              | 0.55        | 3.0214E-04       |
| 79 | CUST_11886_PI427704219 | lnc-PRDM8-1            | lnc-PRDM8-1:2            | 3.94                        | 0.35                    | 4.91                                  | 1.53                              | 0.55        | 4.0466E-02       |
| 80 | CUST_22537_PI427704219 | lnc-KIAA1328-2         | lnc-KIAA1328-2:1         | 3.87                        | 0.37                    | 4.84                                  | 0.85                              | 0.54        | 1.1861E-02       |
| 81 | CUST_2451_PI427704219  | lnc-GPR65-1            | lnc-GPR65-1:9            | 4.98                        | 0.23                    | 5.95                                  | 0.52                              | 0.54        | 3.1742E-03       |
| 82 | CUST_11101_PI427704219 | lnc-HEY2-1             | lnc-HEY2-1:1             | 4.54                        | 0.45                    | 5.51                                  | 1.35                              | 0.54        | 3.1715E-02       |
| 83 | CUST_15631_PI427704219 | lnc-CRYBA4-1           | lnc-CRYBA4-1:9           | 4.41                        | 0.53                    | 5.39                                  | 0.33                              | 0.54        | 1.1906E-03       |
| 84 | CUST_22082_PI427704219 | lnc-OR4F15-1           | lnc-OR4F15-1:1           | 9.12                        | 0.48                    | 10.10                                 | 0.19                              | 0.54        | 2.4690E-04       |
| 85 | CUST_8503_PI427704219  | lnc-TFAP2A-2           | lnc-TFAP2A-2:6           | 4.37                        | 0.21                    | 5.34                                  | 0.52                              | 0.54        | 2.7800E-03       |
| 86 | CUST_3649_PI427704219  | lnc-C13orf15-1         | lnc-C13orf15-1:1         | 5.06                        | 0.30                    | 6.04                                  | 0.04                              | 0.54        | 2.5109E-06       |
| 87 | A_33_P3403728          | lnc-ANGPT2-1           | lnc-ANGPT2-1:2           | 4.98                        | 0.31                    | 5.96                                  | 0.29                              | 0.54        | 5.3733E-04       |
| 88 | CUST_8974_PI427704219  | lnc-NT5DC1-4           | lnc-NT5DC1-4:1           | 4.33                        | 0.50                    | 5.31                                  | 0.52                              | 0.54        | 3.2558E-03       |
| 89 | CUST_3456_PI427704219  | lnc-LSR-1              | lnc-LSR-1:1              | 3.78                        | 0.33                    | 4.77                                  | 1.47                              | 0.53        | 3.2797E-02       |
| 90 | CUST_4260_PI427704219  | lnc-OVOL1-1            | lnc-OVOL1-1:1            | 4.02                        | 0.24                    | 5.02                                  | 1.68                              | 0.53        | 4.1451E-02       |
| 91 | CUST_22239_PI427704219 | lnc-BOD1-2             | lnc-BOD1-2:4             | 3.53                        | 0.23                    | 4.53                                  | 1.03                              | 0.53        | 1.4985E-02       |
| 92 | CUST_11524_PI427704219 | lnc-SPPL2A.1-1         | lnc-SPPL2A.1-1:1         | 5.74                        | 0.36                    | 6.74                                  | 0.18                              | 0.53        | 1.2973E-04       |

|     |                        |                       |                          |      |      |       |      |      |            |
|-----|------------------------|-----------------------|--------------------------|------|------|-------|------|------|------------|
| 93  | CUST_17981_PI427704219 | Inc-HERC1-1           | Inc-HERC1-1:7            | 8.40 | 0.45 | 9.40  | 0.11 | 0.53 | 3.7663E-05 |
| 94  | CUST_9312_PI427704219  | Inc-KIAA1147-3        | Inc-KIAA1147-3:1         | 4.00 | 0.34 | 5.01  | 1.43 | 0.53 | 2.9775E-02 |
| 95  | CUST_21732_PI427704219 | Inc-TELO2-3           | Inc-TELO2-3:2            | 5.59 | 0.45 | 6.59  | 0.75 | 0.53 | 7.1506E-03 |
| 96  | CUST_10334_PI427704219 | Inc-FAM153C-3         | Inc-FAM153C-3:1          | 4.65 | 0.32 | 5.67  | 0.72 | 0.52 | 5.5846E-03 |
| 97  | CUST_10005_PI427704219 | Inc-C5orf38-3         | Inc-C5orf38-3:3          | 4.35 | 0.28 | 5.37  | 1.95 | 0.52 | 4.8305E-02 |
| 98  | CUST_7461_PI427704219  | Inc-LDLRAP1-1         | Inc-LDLRAP1-1:2          | 6.81 | 0.40 | 7.84  | 0.52 | 0.52 | 2.2058E-03 |
| 99  | CUST_17985_PI427704219 | Inc-LMF1-1            | Inc-LMF1-1:1             | 6.39 | 0.35 | 7.43  | 0.27 | 0.52 | 2.8750E-04 |
| 100 | CUST_19369_PI427704219 | Inc-BIRC7-2           | Inc-BIRC7-2:3            | 4.88 | 0.62 | 5.92  | 0.11 | 0.52 | 4.3940E-05 |
| 101 | CUST_21750_PI427704219 | Inc-REM1-1            | Inc-REM1-1:1             | 4.68 | 0.19 | 5.71  | 0.79 | 0.52 | 5.8704E-03 |
| 102 | CUST_3747_PI427704219  | Inc-OPRK1-3           | Inc-OPRK1-3:1            | 3.61 | 0.35 | 4.65  | 0.30 | 0.52 | 3.9588E-04 |
| 103 | CUST_8746_PI427704219  | Inc-FRG1-6            | Inc-FRG1-6:2             | 3.94 | 0.34 | 4.98  | 0.62 | 0.52 | 3.3700E-03 |
| 104 | CUST_11629_PI427704219 | Inc-C14orf166-1       | Inc-C14orf166-1:1        | 4.08 | 0.38 | 5.12  | 1.59 | 0.52 | 3.1613E-02 |
| 105 | CUST_21219_PI427704219 | Inc-VRK2-7            | Inc-VRK2-7:1             | 4.19 | 0.55 | 5.24  | 1.01 | 0.51 | 1.2079E-02 |
| 106 | CUST_18892_PI427704219 | Inc-ZNF74-1           | Inc-ZNF74-1:3            | 6.08 | 0.31 | 7.14  | 0.99 | 0.51 | 9.9406E-03 |
| 107 | CUST_3918_PI427704219  | Inc-VWA5B1-1          | Inc-VWA5B1-1:1           | 5.12 | 0.34 | 6.18  | 1.08 | 0.51 | 1.2172E-02 |
| 108 | CUST_11456_PI427704219 | Inc-RP3-377D14.1.1-6  | Inc-RP3-377D14.1.1-6:6   | 6.11 | 0.63 | 7.17  | 0.42 | 0.51 | 1.2513E-03 |
| 109 | CUST_11392_PI427704219 | Inc-RP11-204N11.1.1-3 | Inc-RP11-204N11.1.1-3:8  | 4.02 | 0.39 | 5.09  | 1.30 | 0.51 | 1.8120E-02 |
| 110 | CUST_10539_PI427704219 | Inc-AC109486.1-1      | Inc-AC109486.1-1:1       | 5.72 | 0.35 | 6.80  | 0.47 | 0.51 | 1.2165E-03 |
| 111 | CUST_4739_PI427704219  | Inc-GADD45G-5         | Inc-GADD45G-5:2          | 3.87 | 0.38 | 4.95  | 1.60 | 0.50 | 2.7125E-02 |
| 112 | CUST_660_PI427704219   | Inc-AC131097.4.1-1    | Inc-AC131097.4.1-1:2     | 5.87 | 0.29 | 6.95  | 1.65 | 0.50 | 2.8268E-02 |
| 113 | CUST_9976_PI427704219  | Inc-VPS18-1           | Inc-VPS18-1:3            | 6.44 | 0.60 | 7.52  | 0.49 | 0.50 | 1.5969E-03 |
| 114 | CUST_15292_PI427704219 | Inc-PIEZO2-3          | Inc-PIEZO2-3:3           | 5.24 | 0.56 | 6.32  | 0.96 | 0.50 | 9.0178E-03 |
| 115 | CUST_13622_PI427704219 | Inc-OGFRL1-1          | Inc-OGFRL1-1:1           | 4.61 | 0.28 | 5.70  | 0.83 | 0.50 | 5.5105E-03 |
| 116 | CUST_7132_PI427704219  | Inc-ARRDC4-6          | Inc-ARRDC4-6:2           | 5.02 | 0.64 | 6.10  | 0.88 | 0.50 | 7.4088E-03 |
| 117 | CUST_21918_PI427704219 | Inc-RAP1GDS1-4        | Inc-RAP1GDS1-4:1         | 4.02 | 0.46 | 5.10  | 1.68 | 0.50 | 2.9142E-02 |
| 118 | CUST_9443_PI427704219  | Inc-DEK-1             | Inc-DEK-1:1              | 5.24 | 0.62 | 6.33  | 0.38 | 0.50 | 7.5996E-04 |
| 119 | CUST_11064_PI427704219 | Inc-TRIM27-15         | Inc-TRIM27-15:1          | 4.11 | 0.49 | 5.20  | 1.63 | 0.50 | 2.7089E-02 |
| 120 | CUST_8188_PI427704219  | Inc-GDF7-1            | Inc-GDF7-1:1             | 4.63 | 0.57 | 5.73  | 1.74 | 0.50 | 3.0297E-02 |
| 121 | CUST_6136_PI427704219  | Inc-ODZ4-2            | Inc-ODZ4-2:1             | 3.87 | 0.39 | 4.97  | 1.60 | 0.50 | 2.4548E-02 |
| 122 | CUST_17782_PI427704219 | Inc-PPP1R3B-4         | Inc-PPP1R3B-4:3          | 4.91 | 0.34 | 6.02  | 0.26 | 0.49 | 1.3350E-04 |
| 123 | CUST_11558_PI427704219 | Inc-RP11-826N14.2.1-2 | Inc-RP11-826N14.2.1-2:1  | 3.27 | 0.51 | 4.38  | 0.24 | 0.49 | 1.4856E-04 |
| 124 | CUST_10862_PI427704219 | Inc-HIBADH-1          | Inc-HIBADH-1:1           | 3.77 | 0.23 | 4.88  | 0.95 | 0.49 | 6.3751E-03 |
| 125 | CUST_22783_PI427704219 | Inc-GABRA5-2          | Inc-GABRA5-2:1           | 4.02 | 0.17 | 5.14  | 2.29 | 0.49 | 4.5002E-02 |
| 126 | CUST_2346_PI427704219  | Inc-RABL2A-2          | Inc-RABL2A-2:1           | 8.58 | 0.46 | 9.71  | 0.46 | 0.49 | 8.2943E-04 |
| 127 | CUST_15959_PI427704219 | Inc-DHX37-10          | Inc-DHX37-10:15          | 3.53 | 0.56 | 4.66  | 0.49 | 0.49 | 1.0981E-03 |
| 128 | CUST_21764_PI427704219 | Inc-WDR63-1           | Inc-WDR63-1:1            | 8.94 | 0.69 | 10.09 | 0.42 | 0.48 | 7.1727E-04 |
| 129 | CUST_7763_PI427704219  | Inc-TMEM161B-2        | Inc-TMEM161B-2:1         | 4.45 | 0.17 | 5.60  | 0.11 | 0.48 | 3.7663E-06 |
| 130 | CUST_4375_PI427704219  | Inc-AC009365.3.1-4    | Inc-AC009365.3.1-4:1     | 5.38 | 0.29 | 6.53  | 0.98 | 0.48 | 5.7302E-03 |
| 131 | CUST_22503_PI427704219 | Inc-PPIAL4G-5         | Inc-PPIAL4G-5:12         | 5.70 | 0.80 | 6.85  | 0.61 | 0.48 | 2.0008E-03 |
| 132 | CUST_11121_PI427704219 | Inc-DENND5A-1         | Inc-DENND5A-1:1          | 8.19 | 0.55 | 9.35  | 0.87 | 0.48 | 4.6405E-03 |
| 133 | CUST_1338_PI427704219  | Inc-SLFN5-1           | Inc-SLFN5-1:1            | 4.73 | 0.69 | 5.89  | 0.20 | 0.48 | 7.9093E-05 |
| 134 | CUST_9810_PI427704219  | Inc-SLFN5-1           | Inc-SLFN5-1:4            | 4.60 | 0.76 | 5.76  | 0.08 | 0.48 | 1.4647E-05 |
| 135 | CUST_12647_PI427704219 | Inc-TRIML2-4          | Inc-TRIML2-4:1           | 3.83 | 0.40 | 4.99  | 1.75 | 0.48 | 2.2626E-02 |
| 136 | CUST_22292_PI427704219 | Inc-SDK2-2            | Inc-SDK2-2:3             | 3.51 | 0.34 | 4.67  | 0.07 | 0.48 | 8.3696E-07 |
| 137 | CUST_18669_PI427704219 | Inc-ELF2-3            | Inc-ELF2-3:1             | 3.77 | 0.36 | 4.93  | 0.87 | 0.47 | 3.8659E-03 |
| 138 | CUST_15468_PI427704219 | Inc-ANLN-3            | Inc-ANLN-3:1             | 4.49 | 0.37 | 5.65  | 0.44 | 0.47 | 4.6786E-04 |
| 139 | CUST_15022_PI427704219 | Inc-BOD1-1            | Inc-BOD1-1:3             | 3.83 | 0.20 | 5.01  | 1.96 | 0.47 | 2.6719E-02 |
| 140 | CUST_4243_PI427704219  | Inc-FAM182B-6         | Inc-FAM182B-6:4          | 3.99 | 0.30 | 5.17  | 1.58 | 0.47 | 1.6976E-02 |
| 141 | A_33_P3589543          | Inc-RASSF7-1          | Inc-RASSF7-1:1           | 6.08 | 0.54 | 7.25  | 0.19 | 0.47 | 3.8500E-05 |
| 142 | CUST_14641_PI427704219 | Inc-RP11-1085N6.3.1-1 | Inc-RP11-1085N6.3.1-1:1  | 3.39 | 0.70 | 4.56  | 1.28 | 0.47 | 1.1240E-02 |
| 143 | CUST_1699_PI427704219  | Inc-PITX2-1           | Inc-PITX2-1:2            | 4.65 | 0.57 | 5.83  | 0.82 | 0.47 | 3.3173E-03 |
| 144 | CUST_5598_PI427704219  | Inc-MUC20-2           | Inc-MUC20-2:2            | 4.50 | 0.34 | 5.68  | 1.38 | 0.47 | 1.2131E-02 |
| 145 | CUST_14880_PI427704219 | Inc-GALC-3            | Inc-GALC-3:4             | 4.23 | 0.79 | 5.42  | 2.29 | 0.47 | 3.7845E-02 |
| 146 | A_33_P3213149          | Inc-IL17RA-4          | Inc-IL17RA-4:5           | 5.79 | 0.42 | 6.99  | 0.72 | 0.47 | 1.9430E-03 |
| 147 | CUST_15857_PI427704219 | Inc-DHX37-10          | Inc-DHX37-10:6           | 3.70 | 0.40 | 4.89  | 0.30 | 0.47 | 1.0713E-04 |
| 148 | CUST_22644_PI427704219 | Inc-SPRED2-7          | Inc-SPRED2-7:1           | 7.15 | 0.52 | 8.36  | 2.25 | 0.46 | 3.2865E-02 |
| 149 | CUST_16156_PI427704219 | Inc-C5orf32-1         | Inc-C5orf32-1:10         | 6.09 | 0.40 | 7.30  | 0.85 | 0.46 | 2.7959E-03 |
| 150 | CUST_16296_PI427704219 | Inc-RP11-204N11.1.1-3 | Inc-RP11-204N11.1.1-3:15 | 4.71 | 0.88 | 5.92  | 0.63 | 0.46 | 1.5973E-03 |
| 151 | CUST_4831_PI427704219  | Inc-C2orf69-2         | Inc-C2orf69-2:3          | 4.52 | 0.49 | 5.73  | 1.49 | 0.46 | 1.2735E-02 |
| 152 | CUST_8339_PI427704219  | Inc-TMPRSS15-9        | Inc-TMPRSS15-9:1         | 4.08 | 0.38 | 5.30  | 1.39 | 0.46 | 1.0484E-02 |
| 153 | CUST_87_PI427704219    | Inc-GPR142-1          | Inc-GPR142-1:1           | 5.73 | 0.58 | 6.95  | 0.33 | 0.46 | 1.6656E-04 |
| 154 | CUST_5282_PI427704219  | Inc-TRIML1-3          | Inc-TRIML1-3:5           | 6.33 | 0.37 | 7.55  | 2.46 | 0.46 | 3.6327E-02 |
| 155 | CUST_13134_PI427704219 | Inc-GPR89B-5          | Inc-GPR89B-5:1           | 4.84 | 0.66 | 6.06  | 0.96 | 0.46 | 4.3246E-03 |
| 156 | CUST_10880_PI427704219 | Inc-ARL15-3           | Inc-ARL15-3:1            | 4.75 | 0.36 | 5.97  | 2.60 | 0.46 | 4.0071E-02 |
| 157 | CUST_4455_PI427704219  | Inc-AL137145.1-2      | Inc-AL137145.1-2:13      | 5.08 | 0.83 | 6.30  | 1.45 | 0.45 | 1.2491E-02 |
| 158 | CUST_13170_PI427704219 | Inc-FAM160A1-3        | Inc-FAM160A1-3:1         | 3.33 | 0.23 | 4.56  | 2.00 | 0.45 | 2.2464E-02 |
| 159 | CUST_11881_PI427704219 | Inc-ZNF705A-1         | Inc-ZNF705A-1:9          | 3.77 | 0.50 | 5.01  | 1.82 | 0.45 | 1.8596E-02 |
| 160 | CUST_22462_PI427704219 | Inc-WRAP73-2          | Inc-WRAP73-2:1           | 5.68 | 0.38 | 6.92  | 0.19 | 0.45 | 1.7576E-05 |
| 161 | CUST_15777_PI427704219 | Inc-AUH-2             | Inc-AUH-2:2              | 4.62 | 0.47 | 5.86  | 1.55 | 0.45 | 1.2642E-02 |
| 162 | CUST_20985_PI427704219 | Inc-C1orf201-3        | Inc-C1orf201-3:4         | 6.16 | 0.67 | 7.40  | 0.56 | 0.45 | 7.9386E-04 |
| 163 | CUST_2693_PI427704219  | Inc-AL137145.1-2      | Inc-AL137145.1-2:14      | 4.96 | 0.75 | 6.20  | 1.19 | 0.45 | 6.8355E-03 |
| 164 | CUST_15586_PI427704219 | Inc-EFEMP1-1          | Inc-EFEMP1-1:1           | 4.29 | 0.37 | 5.54  | 1.21 | 0.45 | 6.2282E-03 |
| 165 | CUST_916_PI427704219   | Inc-CLCN3-1           | Inc-CLCN3-1:3            | 5.43 | 0.29 | 6.69  | 2.42 | 0.44 | 2.9705E-02 |
| 166 | CUST_12423_PI427704219 | Inc-STRA6-1           | Inc-STRA6-1:1            | 4.48 | 0.65 | 5.74  | 1.77 | 0.44 | 1.5813E-02 |
| 167 | CUST_7995_PI427704219  | Inc-WDR48-1           | Inc-WDR48-1:2            | 3.41 | 0.48 | 4.68  | 1.53 | 0.44 | 1.0900E-02 |
| 168 | CUST_20276_PI427704219 | Inc-SLCO6A1-1         | Inc-SLCO6A1-1:1          | 5.81 | 0.43 | 7.07  | 0.49 | 0.44 | 3.4148E-04 |
| 169 | CUST_2541_PI427704219  | Inc-DHX37-10          | Inc-DHX37-10:2           | 4.59 | 0.71 | 5.87  | 0.38 | 0.44 | 2.0296E-04 |
| 170 | CUST_23036_PI427704219 | Inc-MYCBP2-1          | Inc-MYCBP2-1:1           | 4.27 | 0.97 | 5.55  | 2.05 | 0.44 | 2.2030E-02 |
| 171 | CUST_18635_PI427704219 | Inc-FANCI-2           | Inc-FANCI-2:9            | 6.69 | 0.66 | 7.98  | 0.25 | 0.44 | 4.3522E-05 |
| 172 | CUST_10287_PI427704219 | Inc-AL713998.1-2      | Inc-AL713998.1-2:1       | 7.13 | 1.04 | 8.43  | 0.15 | 0.43 | 2.5527E-05 |
| 173 | CUST_20390_PI427704219 | Inc-RP11-204N11.1.1-3 | Inc-RP11-204N11.1.1-3:17 | 5.47 | 0.65 | 6.77  | 0.77 | 0.43 | 1.3906E-03 |
| 174 | CUST_13309_PI427704219 | Inc-RP11-204N11.1.1-3 | Inc-RP11-204N11.1.1-3:9  | 4.62 | 0.74 | 5.93  | 0.74 | 0.43 | 1.2985E-03 |
| 175 | CUST_16478_PI427704219 | Inc-RASSF7-1          | Inc-RASSF7-1:2           | 6.30 | 0.39 | 7.61  | 0.15 | 0.43 | 4.1848E-06 |
| 176 | CUST_17587_PI427704219 | Inc-GPR83-2           | Inc-GPR83-2:1            | 8.79 | 0.60 | 10.10 | 1.00 | 0.43 | 2.7540E-03 |
| 177 | CUST_6383_PI427704219  | Inc-ZNF461-1          | Inc-ZNF461-1:2           | 6.08 | 0.43 | 7.40  | 2.20 | 0.43 | 2.0168E-02 |
| 178 | CUST_7351_PI427704219  | Inc-DHX37-10          | Inc-DHX37-10:12          | 3.25 | 0.70 | 4.57  | 0.45 | 0.43 | 2.4774E-04 |
| 179 | CUST_16490_PI427704219 | Inc-NUFIP1-1          | Inc-NUFIP1-1:5           | 4.92 | 0.23 | 6.24  | 0.69 | 0.43 | 6.6538E-04 |
| 180 | CUST_1458_PI427704219  | Inc-TPO-2             | Inc-TPO-2:2              | 3.89 | 0.54 | 5.21  | 1.39 | 0.43 | 6.7049E-03 |
| 181 | CUST_14535_PI427704219 | Inc-CDH5-9            | Inc-CDH5-9:1             | 3.71 | 0.31 | 5.04  | 0.17 | 0.43 | 4.1848E-06 |
| 182 | CUST_4946_PI427704219  | Inc-PCDH12-1          | Inc-PCDH12-1:1           | 5.74 | 0.41 | 7.07  | 0.89 | 0.42 | 1.6137E-03 |
| 183 | CUST_5236_PI427704219  | Inc-TSHZ3-2           | Inc-TSHZ3-2:1            | 3.83 | 0.65 | 5.16  | 1.57 | 0.42 | 8.9576E-03 |
| 184 | CUST_15579_PI427704219 | Inc-HEATR2-3          | Inc-HEATR2-3:7           | 3.98 | 0.45 | 5.34  | 0.38 | 0.41 | 6.4446E-05 |
| 185 | CUST_2179_PI427704219  | Inc-ACSM4-1           | Inc-ACSM4-1:1            | 3.37 | 0.54 | 4.74  | 1.29 | 0.41 | 4.1291E-03 |
| 186 | CUST_5732_PI427704219  | Inc-GLT6D1-1          | Inc-GLT6D1-1:1           | 3.61 | 0.24 | 4.99  | 2.13 | 0.41 | 1.3932E-02 |
| 187 | CUST_13734_PI427704219 | Inc-HAND2-1           | Inc-HAND2-1:1            | 4.17 | 0.25 | 5.57  | 0.85 | 0.40 | 7.9846E-04 |
| 188 | CUST_18768_PI427704219 | Inc-ZC3H12B-2         | Inc-ZC3H12B-2:2          | 7.44 | 1.46 | 8.85  | 0.46 | 0.40 | 3.0382E-04 |
| 189 | CUST_10448_PI427704219 | Inc-FAM160A1-1        | Inc-FAM160A1-1:1         | 5.10 | 1.37 | 6.51  | 0.73 | 0.40 | 9.7004E-04 |

|     |                        |                       |                         |       |      |       |      |      |            |
|-----|------------------------|-----------------------|-------------------------|-------|------|-------|------|------|------------|
| 190 | A_33_P3348519          | lnc-IL18BP-1          | lnc-IL18BP-1:2          | 5.78  | 0.35 | 7.20  | 0.92 | 0.40 | 1.0793E-03 |
| 191 | CUST_2020_P1427704219  | lnc-GLB1L2-3          | lnc-GLB1L2-3:3          | 7.49  | 0.64 | 8.91  | 3.94 | 0.40 | 4.8754E-02 |
| 192 | CUST_5881_P1427704219  | lnc-RNF144A-3         | lnc-RNF144A-3:1         | 4.61  | 0.58 | 6.03  | 0.24 | 0.40 | 1.2136E-05 |
| 193 | CUST_10045_P1427704219 | lnc-TMEM74-1          | lnc-TMEM74-1:1          | 3.80  | 0.17 | 5.22  | 0.92 | 0.40 | 9.1019E-04 |
| 194 | CUST_15189_P1427704219 | lnc-AC009365.3.1-1    | lnc-AC009365.3.1-1:1    | 4.19  | 0.50 | 5.62  | 2.60 | 0.40 | 1.9947E-02 |
| 195 | CUST_18780_P1427704219 | lnc-BRCA1-1           | lnc-BRCA1-1:1           | 4.94  | 0.93 | 6.37  | 2.24 | 0.40 | 1.5046E-02 |
| 196 | CUST_13771_P1427704219 | lnc-USP31-1           | lnc-USP31-1:1           | 5.97  | 0.38 | 7.40  | 1.85 | 0.39 | 8.2436E-03 |
| 197 | CUST_7528_P1427704219  | lnc-TNFRSF10A-1       | lnc-TNFRSF10A-1:3       | 6.50  | 0.84 | 7.95  | 0.94 | 0.39 | 1.1977E-03 |
| 198 | CUST_12785_P1427704219 | lnc-FANCI-2           | lnc-FANCI-2:21          | 6.52  | 0.75 | 7.98  | 0.22 | 0.39 | 1.0044E-05 |
| 199 | CUST_11560_P1427704219 | lnc-SPATA5-2          | lnc-SPATA5-2:1          | 4.14  | 0.45 | 5.59  | 1.94 | 0.39 | 8.5843E-03 |
| 200 | CUST_15794_P1427704219 | lnc-THUMP3-1          | lnc-THUMP3-1:2          | 7.57  | 1.15 | 9.03  | 0.79 | 0.39 | 8.0683E-04 |
| 201 | CUST_437_P1427704219   | lnc-MRE11A-1          | lnc-MRE11A-1:2          | 4.82  | 0.57 | 6.28  | 1.36 | 0.39 | 3.1302E-03 |
| 202 | CUST_4918_P1427704219  | lnc-FAM120B-3         | lnc-FAM120B-3:1         | 5.98  | 0.63 | 7.44  | 1.90 | 0.39 | 8.2127E-03 |
| 203 | CUST_17121_P1427704219 | lnc-C10orf122-1       | lnc-C10orf122-1:8       | 4.54  | 0.45 | 6.01  | 2.19 | 0.38 | 1.0936E-02 |
| 204 | CUST_14330_P1427704219 | lnc-SH3GL3-1          | lnc-SH3GL3-1:1          | 4.83  | 0.61 | 6.30  | 0.18 | 0.38 | 4.1848E-06 |
| 205 | CUST_10043_P1427704219 | lnc-ELAVL4-1          | lnc-ELAVL4-1:1          | 3.51  | 0.33 | 4.99  | 2.01 | 0.38 | 8.4014E-03 |
| 206 | CUST_3900_P1427704219  | lnc-DHX37-10          | lnc-DHX37-10:19         | 3.69  | 0.67 | 5.18  | 0.51 | 0.38 | 1.0629E-04 |
| 207 | CUST_1162_P1427704219  | lnc-CALML5-1          | lnc-CALML5-1:1          | 5.98  | 0.23 | 7.47  | 3.89 | 0.38 | 3.6768E-02 |
| 208 | CUST_14016_P1427704219 | lnc-RFPL3-2           | lnc-RFPL3-2:1           | 4.11  | 1.03 | 5.61  | 1.06 | 0.38 | 1.5111E-03 |
| 209 | CUST_3074_P1427704219  | lnc-GPR78-1           | lnc-GPR78-1:1           | 4.78  | 0.80 | 6.27  | 1.33 | 0.38 | 2.6929E-03 |
| 210 | CUST_22846_P1427704219 | lnc-PKDCC-2           | lnc-PKDCC-2:2           | 4.57  | 0.53 | 6.07  | 1.80 | 0.38 | 5.8106E-03 |
| 211 | CUST_12973_P1427704219 | lnc-PPIA-1            | lnc-PPIA-1:4            | 10.08 | 0.68 | 11.59 | 0.50 | 0.37 | 7.8256E-05 |
| 212 | CUST_9438_P1427704219  | lnc-TMEM189-UBE2V1-3  | lnc-TMEM189-UBE2V1-3:1  | 6.34  | 0.50 | 7.86  | 2.83 | 0.37 | 1.7268E-02 |
| 213 | CUST_4510_P1427704219  | lnc-ULBP3-1           | lnc-ULBP3-1:1           | 4.91  | 0.59 | 6.44  | 2.13 | 0.37 | 8.4315E-03 |
| 214 | CUST_3664_P1427704219  | lnc-FMN1-4            | lnc-FMN1-4:1            | 4.60  | 0.69 | 6.14  | 0.59 | 0.37 | 1.3350E-04 |
| 215 | CUST_308_P1427704219   | lnc-PPIA-1            | lnc-PPIA-1:2            | 10.08 | 0.67 | 11.63 | 0.52 | 0.36 | 6.8631E-05 |
| 216 | CUST_17715_P1427704219 | lnc-TLL2-1            | lnc-TLL2-1:1            | 4.53  | 0.62 | 6.08  | 3.18 | 0.36 | 2.0882E-02 |
| 217 | CUST_473_P1427704219   | lnc-C1QTNF8-3         | lnc-C1QTNF8-3:8         | 6.80  | 1.70 | 8.36  | 1.65 | 0.36 | 4.9268E-03 |
| 218 | CUST_7576_P1427704219  | lnc-LMF1-2            | lnc-LMF1-2:1            | 5.25  | 0.68 | 6.83  | 1.65 | 0.36 | 3.3370E-03 |
| 219 | CUST_21816_P1427704219 | lnc-RTL1-8            | lnc-RTL1-8:1            | 4.07  | 0.87 | 5.65  | 2.50 | 0.36 | 1.0980E-02 |
| 220 | CUST_2466_P1427704219  | lnc-EPG5-1            | lnc-EPG5-1:1            | 4.89  | 0.61 | 6.47  | 1.97 | 0.36 | 5.5114E-03 |
| 221 | CUST_8752_P1427704219  | lnc-C12orf43-1        | lnc-C12orf43-1:4        | 5.68  | 1.23 | 7.27  | 3.40 | 0.35 | 2.3052E-02 |
| 222 | CUST_16602_P1427704219 | lnc-TMEM18-12         | lnc-TMEM18-12:1         | 4.41  | 0.77 | 6.00  | 1.76 | 0.35 | 4.0015E-03 |
| 223 | CUST_22229_P1427704219 | lnc-APPL2-1           | lnc-APPL2-1:1           | 4.27  | 0.71 | 5.86  | 3.42 | 0.35 | 2.1309E-02 |
| 224 | CUST_14711_P1427704219 | lnc-NDUFV2-1          | lnc-NDUFV2-1:2          | 3.92  | 0.57 | 5.52  | 2.22 | 0.35 | 7.1024E-03 |
| 225 | CUST_8809_P1427704219  | lnc-TNRC6A-1          | lnc-TNRC6A-1:1          | 3.80  | 1.04 | 5.40  | 3.05 | 0.35 | 1.6732E-02 |
| 226 | CUST_16285_P1427704219 | lnc-SUPT3H-1          | lnc-SUPT3H-1:7          | 6.59  | 1.94 | 8.19  | 1.03 | 0.35 | 1.1630E-03 |
| 227 | CUST_14676_P1427704219 | lnc-PFKP-11           | lnc-PFKP-11:1           | 5.68  | 0.68 | 7.29  | 1.57 | 0.35 | 2.5732E-03 |
| 228 | CUST_3835_P1427704219  | lnc-BTN3A2-1          | lnc-BTN3A2-1:1          | 4.14  | 0.68 | 5.74  | 3.17 | 0.35 | 1.7338E-02 |
| 229 | CUST_16448_P1427704219 | lnc-DLK1-4            | lnc-DLK1-4:23           | 8.24  | 1.24 | 9.86  | 2.16 | 0.35 | 7.1255E-03 |
| 230 | CUST_19479_P1427704219 | lnc-CLVS1-3           | lnc-CLVS1-3:1           | 4.96  | 1.28 | 6.59  | 2.05 | 0.35 | 5.9709E-03 |
| 231 | CUST_19230_P1427704219 | lnc-MAGI2-1           | lnc-MAGI2-1:2           | 3.85  | 0.50 | 5.47  | 2.84 | 0.35 | 1.2268E-02 |
| 232 | CUST_896_P1427704219   | lnc-PRMT8-2           | lnc-PRMT8-2:1           | 5.13  | 1.60 | 6.80  | 1.54 | 0.34 | 2.3719E-03 |
| 233 | CUST_4446_P1427704219  | lnc-NUFIP1-2          | lnc-NUFIP1-2:1          | 4.09  | 0.96 | 5.76  | 3.36 | 0.33 | 1.6725E-02 |
| 234 | CUST_13527_P1427704219 | lnc-C14orf79-2        | lnc-C14orf79-2:2        | 6.70  | 0.44 | 8.40  | 5.81 | 0.33 | 4.7763E-02 |
| 235 | CUST_7771_P1427704219  | lnc-FAM75A5-2         | lnc-FAM75A5-2:1         | 4.84  | 0.78 | 6.53  | 1.99 | 0.33 | 3.6588E-03 |
| 236 | CUST_20921_P1427704219 | lnc-FAM153C-4         | lnc-FAM153C-4:4         | 6.80  | 1.43 | 8.50  | 1.34 | 0.33 | 1.2856E-03 |
| 237 | CUST_15761_P1427704219 | lnc-TRAPPC4-1         | lnc-TRAPPC4-1:1         | 4.69  | 1.00 | 6.40  | 3.09 | 0.32 | 1.1838E-02 |
| 238 | CUST_4076_P1427704219  | lnc-GPR65-1           | lnc-GPR65-1:13          | 6.51  | 0.86 | 8.24  | 1.57 | 0.32 | 1.5354E-03 |
| 239 | A_33_P3409210          | lnc-FAM153C-4         | lnc-FAM153C-4:1         | 6.66  | 1.06 | 8.40  | 1.09 | 0.32 | 4.7246E-04 |
| 240 | CUST_10993_P1427704219 | lnc-EGLN1-2           | lnc-EGLN1-2:1           | 3.74  | 0.25 | 5.49  | 3.15 | 0.32 | 1.0254E-02 |
| 241 | CUST_619_P1427704219   | lnc-RP11-433C9.2.1-1  | lnc-RP11-433C9.2.1-1:1  | 3.57  | 1.16 | 5.34  | 4.89 | 0.31 | 2.8874E-02 |
| 242 | CUST_21581_P1427704219 | lnc-ZNF507-1          | lnc-ZNF507-1:1          | 3.92  | 0.57 | 5.70  | 1.35 | 0.31 | 6.4320E-04 |
| 243 | CUST_22140_P1427704219 | lnc-PCDH10-9          | lnc-PCDH10-9:2          | 9.15  | 1.70 | 10.94 | 1.47 | 0.31 | 1.2358E-03 |
| 244 | CUST_21317_P1427704219 | lnc-DCTD-2            | lnc-DCTD-2:1            | 4.91  | 0.59 | 6.71  | 1.46 | 0.31 | 8.0850E-04 |
| 245 | CUST_1332_P1427704219  | lnc-SOX9-6            | lnc-SOX9-6:1            | 4.85  | 0.66 | 6.66  | 1.81 | 0.30 | 1.6266E-03 |
| 246 | CUST_2544_P1427704219  | lnc-ZSCAN30-2         | lnc-ZSCAN30-2:3         | 3.75  | 0.88 | 5.57  | 4.08 | 0.30 | 1.6789E-02 |
| 247 | CUST_5697_P1427704219  | lnc-GINS2-2           | lnc-GINS2-2:2           | 8.40  | 0.97 | 10.24 | 1.46 | 0.30 | 7.4322E-04 |
| 248 | CUST_11076_P1427704219 | lnc-TRIB2-3           | lnc-TRIB2-3:1           | 4.34  | 0.67 | 6.20  | 2.63 | 0.29 | 4.3334E-03 |
| 249 | CUST_8686_P1427704219  | lnc-COL22A1-2         | lnc-COL22A1-2:1         | 4.25  | 1.74 | 6.13  | 6.81 | 0.29 | 4.5829E-02 |
| 250 | CUST_21494_P1427704219 | lnc-INSIG2-3          | lnc-INSIG2-3:1          | 5.92  | 1.09 | 7.80  | 1.14 | 0.29 | 2.6992E-04 |
| 251 | CUST_6180_P1427704219  | lnc-RP11-973F15.1.1-4 | lnc-RP11-973F15.1.1-4:1 | 5.12  | 0.85 | 7.01  | 0.19 | 0.29 | 0.0000E+00 |
| 252 | CUST_21150_P1427704219 | lnc-KDM4C-2           | lnc-KDM4C-2:2           | 6.06  | 0.34 | 8.01  | 1.06 | 0.28 | 9.4577E-05 |
| 253 | CUST_16469_P1427704219 | lnc-C15orf57-2        | lnc-C15orf57-2:1        | 6.74  | 0.72 | 8.70  | 4.54 | 0.27 | 1.4046E-02 |
| 254 | CUST_20440_P1427704219 | lnc-AJAP1-4           | lnc-AJAP1-4:4           | 4.18  | 1.08 | 6.17  | 2.95 | 0.27 | 4.2225E-03 |
| 255 | CUST_1329_P1427704219  | lnc-AC090186.1-2      | lnc-AC090186.1-2:1      | 4.51  | 1.00 | 6.56  | 2.58 | 0.26 | 2.2025E-03 |
| 256 | CUST_6442_P1427704219  | lnc-ENTHD1-1          | lnc-ENTHD1-1:1          | 4.63  | 0.87 | 6.71  | 3.25 | 0.25 | 4.0141E-03 |
| 257 | CUST_9992_P1427704219  | lnc-NBAS-2            | lnc-NBAS-2:1            | 6.02  | 1.08 | 8.11  | 2.15 | 0.25 | 1.0010E-03 |
| 258 | CUST_9279_P1427704219  | lnc-AL901608.1-3      | lnc-AL901608.1-3:3      | 5.70  | 1.69 | 7.86  | 0.46 | 0.24 | 4.1848E-06 |
| 259 | CUST_17453_P1427704219 | lnc-RNF144A-3         | lnc-RNF144A-3:2         | 6.00  | 1.77 | 8.16  | 0.36 | 0.24 | 1.6739E-06 |
| 260 | CUST_18439_P1427704219 | lnc-RTL1-6            | lnc-RTL1-6:1            | 4.36  | 1.27 | 6.64  | 3.56 | 0.22 | 2.9407E-03 |
| 261 | CUST_7463_P1427704219  | lnc-CDH10-6           | lnc-CDH10-6:3           | 3.81  | 1.66 | 6.13  | 3.93 | 0.21 | 3.7048E-03 |
| 262 | CUST_12075_P1427704219 | lnc-TNP1-2            | lnc-TNP1-2:1            | 4.13  | 1.19 | 6.57  | 4.58 | 0.20 | 3.9806E-03 |
| 263 | CUST_4703_P1427704219  | lnc-ATP6V0D2-2        | lnc-ATP6V0D2-2:1        | 4.57  | 1.19 | 7.03  | 0.82 | 0.19 | 4.6033E-06 |
| 264 | CUST_12915_P1427704219 | lnc-GNG8-1            | lnc-GNG8-1:1            | 4.17  | 1.45 | 6.65  | 4.30 | 0.19 | 2.9545E-03 |
| 265 | CUST_2981_P1427704219  | lnc-YTHDF1-2          | lnc-YTHDF1-2:1          | 6.10  | 1.16 | 8.58  | 3.24 | 0.19 | 1.0399E-03 |
| 266 | CUST_16827_P1427704219 | lnc-PIK3CG-2          | lnc-PIK3CG-2:3          | 6.87  | 1.32 | 9.39  | 1.34 | 0.19 | 2.8875E-05 |
| 267 | CUST_8573_P1427704219  | lnc-TGFBRAP1-5        | lnc-TGFBRAP1-5:3        | 4.82  | 4.25 | 7.39  | 7.80 | 0.18 | 1.5224E-02 |
| 268 | CUST_16128_P1427704219 | lnc-AKAP14-1          | lnc-AKAP14-1:2          | 3.85  | 1.80 | 6.44  | 6.64 | 0.18 | 8.5002E-03 |
| 269 | CUST_10246_P1427704219 | lnc-FBXO25-3          | lnc-FBXO25-3:1          | 8.14  | 1.65 | 10.73 | 1.80 | 0.18 | 7.8674E-05 |
| 270 | CUST_16354_P1427704219 | lnc-IAH1-3            | lnc-IAH1-3:1            | 4.76  | 1.62 | 7.45  | 4.17 | 0.17 | 1.4814E-03 |
| 271 | CUST_1684_P1427704219  | lnc-WDR27-2           | lnc-WDR27-2:3           | 7.39  | 1.82 | 10.13 | 2.83 | 0.16 | 3.1637E-04 |
| 272 | CUST_737_P1427704219   | lnc-TMEM135-2         | lnc-TMEM135-2:2         | 3.65  | 0.30 | 6.45  | 6.23 | 0.15 | 3.7341E-03 |
| 273 | CUST_9383_P1427704219  | lnc-C10orf11-2        | lnc-C10orf11-2:1        | 4.67  | 1.85 | 7.62  | 5.24 | 0.14 | 1.6049E-03 |
| 274 | CUST_2861_P1427704219  | lnc-AGA-5             | lnc-AGA-5:1             | 4.88  | 2.03 | 7.92  | 4.54 | 0.13 | 7.8172E-04 |
| 275 | CUST_17685_P1427704219 | lnc-FASLG-2           | lnc-FASLG-2:1           | 5.20  | 2.17 | 8.27  | 4.62 | 0.13 | 7.6163E-04 |
| 276 | CUST_16719_P1427704219 | lnc-CSMD1-5           | lnc-CSMD1-5:1           | 4.34  | 1.89 | 7.43  | 5.27 | 0.13 | 1.1604E-03 |
| 277 | CUST_11412_P1427704219 | lnc-DHX37-10          | lnc-DHX37-10:10         | 4.58  | 1.72 | 7.71  | 3.28 | 0.12 | 1.5819E-04 |
| 278 | CUST_3811_P1427704219  | lnc-ZC3H12D-2         | lnc-ZC3H12D-2:1         | 6.73  | 2.98 | 10.06 | 5.68 | 0.11 | 9.1019E-04 |
| 279 | CUST_12180_P1427704219 | lnc-SNX24-1           | lnc-SNX24-1:1           | 4.99  | 2.48 | 8.35  | 4.93 | 0.10 | 4.6912E-04 |
| 280 | CUST_530_P1427704219   | lnc-HOXC13-1          | lnc-HOXC13-1:2          | 4.78  | 2.49 | 8.19  | 5.39 | 0.10 | 5.8378E-04 |
| 281 | CUST_7887_P1427704219  | lnc-UBE2Z-1           | lnc-UBE2Z-1:1           | 5.95  | 2.24 | 9.42  | 6.02 | 0.10 | 7.4322E-04 |
| 282 | CUST_10344_P1427704219 | lnc-GFRA2-1           | lnc-GFRA2-1:1           | 5.15  | 3.28 | 8.68  | 6.05 | 0.09 | 7.1100E-04 |
| 283 | CUST_16810_P1427704219 | lnc-SNX18-1           | lnc-SNX18-1:1           | 5.27  | 3.23 | 8.86  | 6.77 | 0.09 | 9.4911E-04 |
| 284 | CUST_6012_P1427704219  | lnc-REEP5-1           | lnc-REEP5-1:1           | 4.93  | 2.96 | 8.53  | 5.30 | 0.09 | 3.5110E-04 |
| 285 | CUST_7483_P1427704219  | lnc-DMXL1-3           | lnc-DMXL1-3:1           | 4.68  | 3.25 | 8.33  | 5.12 | 0.09 | 2.8666E-04 |
| 286 | CUST_14225_P1427704219 | lnc-AL901608.1-2      | lnc-AL901608.1-2:2      | 10.65 | 4.89 | 14.33 | 7.93 | 0.08 | 1.5563E-03 |

|     |                        |              |                |      |      |       |      |      |            |
|-----|------------------------|--------------|----------------|------|------|-------|------|------|------------|
| 287 | CUST_5246_PI427704219  | Inc-FUT8-1   | Inc-FUT8-1:1   | 5.54 | 2.61 | 9.24  | 5.51 | 0.08 | 3.1093E-04 |
| 288 | CUST_19047_PI427704219 | Inc-MAP2K6-2 | Inc-MAP2K6-2:1 | 5.27 | 3.59 | 9.12  | 6.72 | 0.07 | 5.2101E-04 |
| 289 | CUST_10768_PI427704219 | Inc-FUT8-2   | Inc-FUT8-2:2   | 6.46 | 4.62 | 10.63 | 5.65 | 0.06 | 1.3433E-04 |
| 290 | CUST_13229_PI427704219 | Inc-KCTD6-3  | Inc-KCTD6-3:1  | 6.27 | 4.69 | 10.47 | 5.65 | 0.06 | 1.2680E-04 |
| 291 | CUST_4888_PI427704219  | Inc-DHX37-10 | Inc-DHX37-10:1 | 5.25 | 3.51 | 9.50  | 6.91 | 0.06 | 2.3058E-04 |
| 292 | CUST_15289_PI427704219 | Inc-YSK4-1   | Inc-YSK4-1:2   | 9.07 | 5.12 | 13.34 | 4.24 | 0.06 | 3.1804E-05 |
| 293 | CUST_7937_PI427704219  | Inc-MFSD9-4  | Inc-MFSD9-4:1  | 5.74 | 4.75 | 10.08 | 8.19 | 0.05 | 4.3313E-04 |
| 294 | CUST_22178_PI427704219 | Inc-NDUFS8-2 | Inc-NDUFS8-2:3 | 6.84 | 5.86 | 11.22 | 6.83 | 0.05 | 2.1091E-04 |
| 295 | CUST_12301_PI427704219 | Inc-TCL1B-2  | Inc-TCL1B-2:2  | 8.05 | 5.13 | 12.46 | 5.47 | 0.05 | 6.1517E-05 |
| 296 | CUST_2112_PI427704219  | Inc-RAN-1    | Inc-RAN-1:1    | 7.94 | 5.47 | 12.44 | 4.91 | 0.05 | 3.4315E-05 |
| 297 | CUST_15665_PI427704219 | Inc-ACVR2A-2 | Inc-ACVR2A-2:1 | 8.86 | 7.18 | 13.58 | 4.52 | 0.04 | 1.9669E-05 |
| 298 | CUST_1820_PI427704219  | Inc-HMCN1-2  | Inc-HMCN1-2:2  | 7.02 | 7.46 | 11.83 | 7.87 | 0.04 | 1.7241E-04 |
| 299 | CUST_17444_PI427704219 | Inc-SOX6-1   | Inc-SOX6-1:1   | 8.36 | 7.28 | 13.27 | 5.16 | 0.04 | 2.1342E-05 |
| 300 | CUST_4237_PI427704219  | Inc-SUPT3H-1 | Inc-SUPT3H-1:5 | 8.32 | 8.96 | 13.54 | 5.09 | 0.03 | 1.4228E-05 |







**Table S4: Overlap between the top- 15 curated gene sets positively and negatively correlating with the top 5 upregulated lncRNAs (lnc-THADA-4, lnc-SYF2-2, lnc-BASP1-3, lnc-ACSL1-1 and lnc-CROCC-1) and the top 5 downregulated lncRNAs (lnc-SUPT3H-1, lnc-SOX6-1, lnc-HMCN1-2, lnc-ACVR2A-2 and lnc-RAN-1) in JMML compared to healthy controls. All the genesets were significantly (anti-)correlated with the lncRNAs (P-value <0.05). The green '+' symbol indicates a positive correlation between the gene set and the lncRNA and the red '-' symbol indicates a negative correlation between the gene set and the lncRNA.**

| <b>Genesets correlated with top 5 upregulated lncRNAs in JMML</b>     | <b><i>lnc-THADA-4</i></b> | <b><i>lnc-SYF2-2</i></b> | <b><i>lnc-BASP1-3</i></b> | <b><i>lnc-ACSL1-1</i></b> | <b><i>lnc-CROCC-1</i></b> |
|-----------------------------------------------------------------------|---------------------------|--------------------------|---------------------------|---------------------------|---------------------------|
| MULLIGHAN_MLL_SIGNATURE_1_UP                                          | +                         | +                        | +                         |                           | +                         |
| MULLIGHAN_MLL_SIGNATURE_2_UP                                          | +                         | +                        | +                         |                           | +                         |
| LENAOUR_DENDRITIC_CELL_MATURATION_DN                                  |                           | +                        | +                         | +                         |                           |
| THEILGAARD_NEUTROPHIL_AT_SKIN_WOUND_DN                                | +                         | +                        | +                         |                           | +                         |
| BROWN_MYELOID_CELL_DEVELOPMENT_UP                                     |                           | +                        | +                         | +                         | +                         |
| HUANG_GATA2_TARGETS_UP                                                |                           | +                        | +                         |                           |                           |
| LI_DCP2_BOUND_MRNA                                                    |                           |                          |                           |                           |                           |
| VERHAAK_GLIOBLASTOMA_MESENCHYMAL                                      |                           |                          |                           |                           |                           |
| ICHIBA_GRAFT_VERSUS_HOST_DISEASE_35D_UP                               |                           |                          |                           |                           |                           |
| DUNNE_TARGETS_OF_AML1_MTG8_FUSION_UP                                  |                           | +                        | +                         |                           | +                         |
| KAMIKUBO_MYELOID_CEBPA_NETWORK                                        |                           | +                        | +                         |                           |                           |
| KEGG_LYSOSOME                                                         |                           |                          |                           |                           |                           |
| TAKEDA_TARGETS_OF_NUP98_HOXA9_FUSION_16D_DN                           |                           | +                        | +                         |                           | +                         |
| KIM_ALL_DISORDERS_DURATION_CORR_DN                                    |                           |                          |                           |                           |                           |
| BENNETT_SYSTEMIC_LUPUS_ERYTHEMATOSUS                                  |                           | +                        | +                         | +                         |                           |
| RUTELLA_RESPONSE_TO_HGF_DN                                            |                           |                          |                           |                           |                           |
| YAO_TEMPORAL_RESPONSE_TO_PROGESTERONE_CLUSTER_13                      | +                         |                          |                           |                           |                           |
| BROWNE_INTERFERON_RESPONSIVE_GENES                                    |                           |                          | +                         | +                         |                           |
| HECKER_IFNB1_TARGETS                                                  |                           |                          | +                         | +                         |                           |
| TAVOR_CEBPA_TARGETS_UP                                                |                           | +                        | +                         |                           |                           |
| HUANG_GATA2_TARGETS_UP                                                |                           | +                        | +                         |                           |                           |
| KAMIKUBO_MYELOID_CEBPA_NETWORK                                        |                           | +                        | +                         |                           |                           |
| PARK_APL_PATHOGENESIS_DN                                              |                           | +                        | +                         |                           |                           |
| CHUNG_BLISTER_CYTOTOXICITY_DN                                         |                           | +                        | +                         |                           |                           |
| MOOTHA_VOXPPOS                                                        | +                         |                          |                           |                           | +                         |
| PHONG_TNF_TARGETS_UP                                                  |                           |                          |                           | +                         |                           |
| BIOCARTA_IL1R_PATHWAY                                                 |                           |                          |                           | +                         |                           |
| SEKI_INFLAMMATORY_RESPONSE_LPS_UP                                     |                           |                          |                           | +                         |                           |
| ZHANG_RESPONSE_TO_IKK_INHIBITOR_AND_TNF_UP                            |                           |                          |                           | +                         |                           |
| ALTEMEIER_RESPONSE_TO_LPS_WITH_MECHANICAL_VENTILATION                 |                           |                          |                           | +                         |                           |
| NEMETH_INFLAMMATORY_RESPONSE_LPS_UP                                   |                           |                          |                           | +                         |                           |
| THEILGAARD_NEUTROPHIL_AT_SKIN_WOUND_UP                                |                           |                          |                           | +                         |                           |
| HAHTOLA_MYCOSIS_FUNGOIDES_CD4_UP                                      |                           |                          |                           | +                         |                           |
| GALINDO_IMMUNE_RESPONSE_TO_ENTEROTOXIN                                |                           |                          |                           | +                         |                           |
| LUI_THYROID_CANCER_PAX8_PPARG_DN                                      |                           |                          |                           |                           | +                         |
| SEIDEN_ONCOGENESIS_BY_MET                                             |                           |                          |                           |                           | +                         |
| SHEN_SMARCA2_TARGETS_UP                                               |                           |                          |                           |                           | +                         |
| REACTOME_MRNA_SPLICING                                                |                           |                          |                           |                           | +                         |
| SESTO_RESPONSE_TO_UV_C0                                               |                           |                          |                           |                           | +                         |
| OSMAN_BLADDER_CANCER_UP                                               |                           |                          |                           |                           | +                         |
| GOLUB_ALL_VS_AML_DN                                                   |                           |                          |                           |                           | +                         |
| HSIAO_HOUSEKEEPING_GENES                                              |                           |                          |                           |                           | +                         |
| WONG_MITOCHONDRIA_GENE_MODULE                                         | +                         |                          |                           |                           |                           |
| MOOTHA_MITOCHONDRIA                                                   | +                         |                          |                           |                           |                           |
| REACTOME_RESPIRATORY_ELECTRON_TRANSPORT_ATP_SYNTHESIS                 | +                         |                          |                           |                           |                           |
| RHEIN_ALL_GLUCOCORTICOID_THERAPY_DN                                   | +                         |                          |                           |                           |                           |
| REACTOME_TCA_CYCLE_AND_RESPIRATORY_ELECTRON_TRANSPORT                 | +                         |                          |                           |                           |                           |
| REACTOME_RESPIRATORY_ELECTRON_TRANSPORT                               | +                         |                          |                           |                           |                           |
| CHIANG_LIVER_CANCER_SUBCLASS_UNANNOTATED_DN                           | +                         |                          |                           |                           |                           |
| JAATINEN_HEMATOPOIETIC_STEM_CELL_UP                                   | +                         |                          |                           |                           |                           |
| WONG_EMBRYONIC_STEM_CELL_CORE                                         | +                         |                          |                           |                           |                           |
| YAO_TEMPORAL_RESPONSE_TO_PROGESTERONE_CLUSTER_17                      | +                         |                          |                           |                           |                           |
| DAVIES_MULTIPLE_MYELOMA_VS_MGUS_DN                                    |                           | +                        |                           |                           |                           |
| DAVIES_MULTIPLE_MYELOMA_VS_MGUS_DN                                    |                           | +                        |                           |                           |                           |
| <b>Genesets anticorrelated with top 5 upregulated lncRNAs in JMML</b> | <b><i>lnc-THADA-4</i></b> | <b><i>lnc-SYF2-2</i></b> | <b><i>lnc-BASP1-3</i></b> | <b><i>lnc-ACSL1-1</i></b> | <b><i>lnc-CROCC-1</i></b> |
| REACTOME_OLFACTORY_SIGNALING_PATHWAY                                  | -                         | -                        | -                         |                           | -                         |
| KEGG_OLFACTORY_TRANSDUCTION                                           | -                         | -                        | -                         |                           | -                         |
| MIKKELSEN_MCV6_HCP_WITH_H3K27ME3                                      | -                         | -                        | -                         |                           | -                         |
| MIKKELSEN_NPC_HCP_WITH_H3K27ME3                                       | -                         | -                        | -                         |                           | -                         |
| VECCHI_GASTRIC_CANCER_EARLY_DN                                        | -                         | -                        | -                         |                           | -                         |
| MEISSNER_BRAIN_HCP_WITH_H3K27ME3                                      | -                         | -                        | -                         |                           | -                         |
| KONDO_PROSTATE_CANCER_WITH_H3K27ME3                                   | -                         | -                        | -                         |                           | -                         |
| NEWMAN_ERCC6_TARGETS_DN                                               | -                         | -                        | -                         |                           | -                         |
| MIKKELSEN_ES_HCP_WITH_H3K27ME3                                        | -                         | -                        | -                         |                           | -                         |
| NABA_SECRETED_FACTORS                                                 | -                         | -                        | -                         |                           | -                         |
| BHAT_ESR1_TARGETS_NOT_VIA_AKT1_UP                                     | -                         | -                        | -                         |                           | -                         |
| SABATES_COLORECTAL_ADENOMA_DN                                         | -                         | -                        | -                         |                           | -                         |
| MEISSNER_NPC_HCP_WITH_H3K4ME2_AND_H3K27ME3                            | -                         | -                        | -                         |                           | -                         |

|                                                                           |   |   |  |   |   |
|---------------------------------------------------------------------------|---|---|--|---|---|
| REACTOME_GPCR_LIGAND_BINDING                                              | - |   |  |   |   |
| HAHTOLA_SEZARY_SYNDROM_DN                                                 |   | - |  | - |   |
| REACTOME_PEPTIDE_CHAIN_ELONGATION                                         |   | - |  | - |   |
| KEGG_RIBOSOME                                                             |   | - |  | - |   |
| BIOCARTA_CTLA4_PATHWAY                                                    |   | - |  | - |   |
| MIKKELSEN_IPS_ICP_WITH_H3K27ME3                                           | - |   |  |   |   |
| MEISSNER_NPC_HCP_WITH_H3K27ME3                                            | - |   |  |   |   |
| MIKKELSEN_IPS_WITH_HCP_H3K27ME3                                           | - |   |  |   |   |
| MIKKELSEN_ES_HCP_WITH_H3_UNMETHYLATED                                     | - |   |  |   |   |
| BOQUEST_STEM_CELL_CULTURED_VS_FRESH_DN                                    | - |   |  |   |   |
| MIKKELSEN_IPS_HCP_WITH_H3_UNMETHYLATED                                    | - |   |  |   |   |
| REACTOME_LIGAND_GATED_ION_CHANNEL_TRANSPORT                               | - |   |  |   |   |
| REACTOME_PEPTIDE_LIGAND_BINDING_RECEPTORS                                 |   | - |  |   |   |
| MIKKELSEN_ES_ICP_WITH_H3K4ME3_AND_H3K27ME3                                |   | - |  |   |   |
| MIKKELSEN_MEF_ICP_WITH_H3K27ME3                                           |   | - |  |   |   |
| KEGG_CELL_ADHESION_MOLECULES_CAMS                                         |   | - |  |   |   |
| LIM_MAMMARY_STEM_CELL_UP                                                  |   | - |  |   |   |
| ACEVEDO_FGFR1_TARGETS_IN_PROSTATE_CANCER_MODEL_DN                         |   | - |  |   |   |
| REACTOME_3_UTR_MEDIATED_TRANSLATIONAL_REGULATION                          |   | - |  |   |   |
| YAUCH_HEDGEHOG_SIGNALING_PARACRINE_DN                                     |   | - |  |   |   |
| SMID_BREAST_CANCER_LUMINAL_B_UP                                           |   | - |  |   |   |
| NABA_BASEMENT_MEMBRANES                                                   |   |   |  | - |   |
| KEGG_PRIMARY_IMMUNODEFICIENCY                                             |   |   |  | - |   |
| REACTOME_TELOMERE_MAINTENANCE                                             |   |   |  | - |   |
| THUM_MIR21_TARGETS_HEART_DISEASE_UP                                       |   |   |  | - |   |
| REACTOME_RNA_POL_I_PROMOTER_OPENING                                       |   |   |  | - |   |
| REACTOME_DEPOSITION_OF_NEW_CENPA_CONTAINING_NUCLEOSOMES_AT_THE_CENTROMERE |   |   |  | - |   |
| CUI_TCF21_TARGETS_2_UP                                                    |   |   |  | - |   |
| NIKOLSKY_BREAST_CANCER_19Q13.1_AMPLICON                                   |   |   |  | - |   |
| REACTOME_MEIOTIC_RECOMBINATION                                            |   |   |  | - |   |
| REACTOME_PHOSPHORYLATION_OF_CD3_AND_TCR_ZETA_CHAINS                       |   |   |  | - |   |
| ZHAN_MULTIPLE_MYELOMA_MS_UP                                               |   |   |  | - |   |
| ROSS_AML_OF_FAB_M7_TYPE                                                   |   |   |  | - |   |
| REACTOME_CLASS_A1_RHODOPSIN_LIKE_RECEPTORS                                |   |   |  |   | - |
| SHEN_SMARCA2_TARGETS_DN                                                   |   |   |  |   | - |
| MIKKELSEN_MCV6_ICP_WITH_H3K4ME3_AND_H3K27ME3                              |   |   |  |   | - |

| <b>Genesets correlated with top 5 downregulated lncRNAs in JMML</b> | <i>lnc-SUPT3H-1</i> | <i>lnc-SOX6-1</i> | <i>lnc-HMCN1-2</i> | <i>lnc-ACVR2A-2</i> | <i>lnc-RAN-1</i> |
|---------------------------------------------------------------------|---------------------|-------------------|--------------------|---------------------|------------------|
| NIKOLSKY_BREAST_CANCER_19Q13.1_AMPLICON                             | +                   | +                 | +                  | +                   | +                |
| KONDO_PROSTATE_CANCER_WITH_H3K27ME3                                 | +                   | +                 | +                  | +                   | +                |
| SU_KIDNEY                                                           | +                   | +                 | +                  | +                   | +                |
| KEGG_OLFACTORY_TRANSDUCTION                                         | +                   | +                 | +                  | +                   | +                |
| MEISSNER_BRAIN_HCP_WITH_H3K27ME3                                    | +                   | +                 | +                  | +                   | +                |
| REACTOME_OLFACTORY_SIGNALING_PATHWAY                                | +                   | +                 | +                  | +                   | +                |
| MAHADEVAN_IMATINIB_RESISTANCE_UP                                    | +                   | +                 | +                  | +                   | +                |
| REACTOME_SIGNALING_BY_BMP                                           |                     | +                 | +                  | +                   | +                |
| STAEGE_EWING_FAMILY_TUMOR                                           |                     | +                 | +                  | +                   | +                |
| KEGG_STEROID_HORMONE_BIOSYNTHESIS                                   | +                   |                   | +                  | +                   | +                |
| THUM_MIR21_TARGETS_HEART_DISEASE_UP                                 | +                   |                   | +                  | +                   | +                |
| YAMASHITA_LIVER_CANCER_WITH_EPCAM_DN                                | +                   | +                 | +                  | +                   |                  |
| WEBER_METHYLATED_ICP_IN_FIBROBLAST                                  | +                   | +                 |                    | +                   | +                |
| KEGG_MATURITY_ONSET_DIABETES_OF_THE_YOUNG                           | +                   | +                 | +                  |                     | +                |
| MIKKELSEN_NPC_HCP_WITH_H3K27ME3                                     | +                   | +                 |                    |                     | +                |
| BIOCARTA_AMI_PATHWAY                                                |                     |                   | +                  | +                   |                  |
| SHARMA_PILOCYTIC_ASTROCYTOMA_LOCATION_UP                            |                     |                   |                    | +                   |                  |
| MEISSNER_NPC_HCP_WITH_H3K27ME3                                      |                     |                   | +                  |                     |                  |
| REACTOME_REGULATION_OF_BETA_CELL_DEVELOPMENT                        |                     |                   |                    |                     | +                |
| PID_ERBB_NETWORK_PATHWAY                                            |                     | +                 |                    |                     |                  |
| KEGG_HEDGEHOG_SIGNALING_PATHWAY                                     |                     | +                 |                    |                     |                  |
| REACTOME_BETA_DEFENSINS                                             | +                   |                   |                    |                     |                  |
| REACTOME_PACKAGING_OF_TELOMERE_ENDS                                 | +                   |                   |                    |                     |                  |

| <b>Genesets anticorrelated with top 5 downregulated lncRNAs in JMML</b> | <i>lnc-SUPT3H-1</i> | <i>lnc-SOX6-1</i> | <i>lnc-HMCN1-2</i> | <i>lnc-ACVR2A-2</i> | <i>lnc-RAN-1</i> |
|-------------------------------------------------------------------------|---------------------|-------------------|--------------------|---------------------|------------------|
| MULLIGHAN_MLL_SIGNATURE_2_UP                                            | -                   | -                 | -                  | -                   | -                |
| THEILGAARD_NEUTROPHIL_AT_SKIN_WOUND_DN                                  | -                   | -                 | -                  | -                   | -                |
| BROWN_MYELOID_CELL_DEVELOPMENT_UP                                       | -                   | -                 | -                  | -                   | -                |
| HUANG_GATA2_TARGETS_UP                                                  | -                   | -                 | -                  | -                   | -                |
| LI_DCP2_BOUND_MRNA                                                      | -                   | -                 | -                  | -                   | -                |
| VERHAAK_GLIOMASTOMA_MESENCHYMAL                                         | -                   | -                 | -                  | -                   | -                |
| MULLIGHAN_MLL_SIGNATURE_1_UP                                            | -                   | -                 | -                  | -                   | -                |
| DUNNE_TARGETS_OF_AML1_MTG8_FUSION_UP                                    | -                   | -                 | -                  | -                   | -                |
| LENAOUR_DENDRITIC_CELL_MATURATION_DN                                    | -                   | -                 | -                  | -                   | -                |
| TAKEDA_TARGETS_OF_NUP98_HOXA9_FUSION_16D_DN                             | -                   | -                 | -                  | -                   | -                |
| ICHIBA_GRAFT_VERSUS_HOST_DISEASE_35D_UP                                 | -                   | -                 | -                  | -                   | -                |

|                                                  |   |   |   |   |
|--------------------------------------------------|---|---|---|---|
| RUTELLA_RESPONSE_TO_CSF2RB_AND_IL4_DN            | - | - | - | - |
| KAMIKUBO_MYELOID_CEBPA_NETWORK                   |   | - | - | - |
| KIM_ALL_DISORDERS_DURATION_CORR_DN               |   | - | - | - |
| KEGG_LYSOSOME                                    | - |   | - | - |
| RUTELLA_RESPONSE_TO_HGF_DN                       |   | - |   | - |
| HAHTOLA_SEZARY_SYNDROM_UP                        | - |   |   |   |
| PARK_APL_PATHOGENESIS_DN                         | - |   |   |   |
| BENNETT_SYSTEMIC_LUPUS_ERYTHEMATOSUS             |   | - |   |   |
| YAO_TEMPORAL_RESPONSE_TO_PROGESTERONE_CLUSTER_13 |   | - |   |   |
| MARTENS_BOUND_BY_PML_RARA_FUSION                 |   |   | - |   |
| MARKEY_RB1_ACUTE_LOF_DN                          |   |   | - |   |

**Table S5. Differential expressed lncRNAs in different JMML subgroups**

***Differential expressed lncRNAs between elevated HbF for age and normal HbF for age***

| Probe_Name             | Gene_Name      | Transcript       | Fold change | Direction                 |
|------------------------|----------------|------------------|-------------|---------------------------|
| CUST_18292_PI427704219 | lnc-C2orf54-1  | lnc-C2orf54-1:2  | 7.40        | Upregulated in normal HbF |
| CUST_15800_PI427704219 | lnc-TPO-4      | lnc-TPO-4:1      | 3.46        | Upregulated in normal HbF |
| A_32_P10133            | PRINS          | PRINS            | 3.21        | Upregulated in normal HbF |
| A_32_P112623           | FAM27E3        | FAM27E3          | 3.13        | Upregulated in normal HbF |
| CUST_4703_PI427704219  | lnc-ATP6V0D2-2 | lnc-ATP6V0D2-2:1 | 2.79        | Upregulated in normal HbF |
| CUST_2725_PI427704219  | lnc-CCT8-1     | lnc-CCT8-1:1     | 2.36        | Upregulated in normal HbF |
| CUST_1500_PI427704219  | lnc-SH3BGRL2-1 | lnc-SH3BGRL2-1:4 | 2.28        | Upregulated in normal HbF |
| CUST_3307_PI427704219  | lnc-FRMD4A-1   | lnc-FRMD4A-1:4   | 2.13        | Upregulated in normal HbF |

***Differential expressed lncRNAs between JMML patients with monosomy 7 and normal karyotype (blocked for RAS mutations through a randomized block design)***

| Probe_Name             | Gene_Name             | Transcript              | Fold change | direction                 |
|------------------------|-----------------------|-------------------------|-------------|---------------------------|
| CUST_5241_PI427704219  | lnc-RTN1-2            | lnc-RTN1-2:1            | 3.85        | Upregulated in monosomy 7 |
| CUST_18371_PI427704219 | lnc-CREM-1            | lnc-CREM-1:1            | 2.76        | Upregulated in monosomy 7 |
| CUST_18292_PI427704219 | lnc-C2orf54-1         | lnc-C2orf54-1:2         | 9.79        | Upregulated in monosomy 7 |
| CUST_13642_PI427704219 | lnc-TEK-1             | lnc-TEK-1:1             | 2.53        | Upregulated in monosomy 7 |
| CUST_14809_PI427704219 | lnc-SMARCAL1-3        | lnc-SMARCAL1-3:2        | 2.38        | Upregulated in monosomy 7 |
| CUST_7772_PI427704219  | lnc-C1D-2             | lnc-C1D-2:1             | 2.47        | Upregulated in monosomy 7 |
| A_32_P10133            | PRINS                 | PRINS                   | 3.86        | Upregulated in monosomy 7 |
| CUST_11502_PI427704219 | lnc-FRMD4A-1          | lnc-FRMD4A-1:4          | 2.81        | Upregulated in monosomy 7 |
| CUST_16989_PI427704219 | lnc-SH2B3-1           | lnc-SH2B3-1:3           | 4.07        | Upregulated in monosomy 7 |
| CUST_18252_PI427704219 | lnc-RTN1-2            | lnc-RTN1-2:2            | 3.07        | Upregulated in monosomy 7 |
| CUST_1500_PI427704219  | lnc-SH3BGRL2-1        | lnc-SH3BGRL2-1:4        | 2.56        | Upregulated in monosomy 7 |
| CUST_19051_PI427704219 | lnc-HEATR6-1          | lnc-HEATR6-1:3          | 3.58        | Upregulated in monosomy 7 |
| CUST_5922_PI427704219  | lnc-ZNF33A-2          | lnc-ZNF33A-2:1          | 2.54        | Upregulated in monosomy 7 |
| CUST_16665_PI427704219 | lnc-POTEG-4           | lnc-POTEG-4:7           | 3.40        | Upregulated in monosomy 7 |
| CUST_1407_PI427704219  | lnc-SH2B3-1           | lnc-SH2B3-1:2           | 3.68        | Upregulated in monosomy 7 |
| CUST_690_PI427704219   | lnc-BACH1-2           | lnc-BACH1-2:2           | 2.05        | Upregulated in monosomy 7 |
| CUST_1806_PI427704219  | lnc-BANP-2            | lnc-BANP-2:1            | 2.63        | Upregulated in monosomy 7 |
| CUST_8271_PI427704219  | lnc-CACNB3-1          | lnc-CACNB3-1:3          | 2.05        | Upregulated in monosomy 7 |
| CUST_629_PI427704219   | lnc-ZFP37-1           | lnc-ZFP37-1:1           | 2.24        | Upregulated in monosomy 7 |
| CUST_10448_PI427704219 | lnc-FAM160A1-1        | lnc-FAM160A1-1:1        | 3.40        | Upregulated in monosomy 7 |
| A_33_P3221009          | lnc-METTL19-1         | lnc-METTL19-1:2         | 2.38        | Upregulated in monosomy 7 |
| CUST_13028_PI427704219 | lnc-OPHN1-1           | lnc-OPHN1-1:1           | 2.22        | Upregulated in monosomy 7 |
| CUST_9549_PI427704219  | lnc-ZNF705D-2         | lnc-ZNF705D-2:3         | 2.07        | Upregulated in monosomy 7 |
| CUST_6740_PI427704219  | lnc-RP11-342M21.2.1-2 | lnc-RP11-342M21.2.1-2:2 | 2.36        | Upregulated in monosomy 7 |
| CUST_15791_PI427704219 | lnc-NFAM1-2           | lnc-NFAM1-2:2           | 2.92        | Upregulated in monosomy 7 |
| CUST_18215_PI427704219 | lnc-PTGES2-1          | lnc-PTGES2-1:5          | 2.07        | Upregulated in monosomy 7 |
| CUST_4720_PI427704219  | lnc-ZC3H12B-1         | lnc-ZC3H12B-1:1         | 2.00        | Upregulated in monosomy 7 |
| CUST_3062_PI427704219  | lnc-ALG1L-2           | lnc-ALG1L-2:1           | 2.15        | Upregulated in monosomy 7 |
| CUST_2725_PI427704219  | lnc-CCT8-1            | lnc-CCT8-1:1            | 2.61        | Upregulated in monosomy 7 |
| CUST_12689_PI427704219 | lnc-KCTD6-1           | lnc-KCTD6-1:4           | 2.56        | Upregulated in monosomy 7 |
| CUST_4566_PI427704219  | lnc-PIGF-3            | lnc-PIGF-3:2            | 2.75        | Upregulated in monosomy 7 |
| CUST_11748_PI427704219 | lnc-UBE2E2-1          | lnc-UBE2E2-1:1          | 2.12        | Upregulated in monosomy 7 |
| CUST_8891_PI427704219  | lnc-ANKRD31-1         | lnc-ANKRD31-1:1         | 2.11        | Upregulated in monosomy 7 |
| A_23_P166508           | lnc-NFAM1-2           | lnc-NFAM1-2:1           | 2.73        | Upregulated in monosomy 7 |
| CUST_473_PI427704219   | lnc-C1QTNF8-3         | lnc-C1QTNF8-3:8         | 3.13        | Upregulated in monosomy 7 |
| CUST_22503_PI427704219 | lnc-PPIAL4G-5         | lnc-PPIAL4G-5:12        | 2.33        | Upregulated in monosomy 7 |
| CUST_11264_PI427704219 | lnc-ZEB2-1            | lnc-ZEB2-1:1            | 2.58        | Upregulated in monosomy 7 |
| CUST_19257_PI427704219 | lnc-AL592284.1-1      | lnc-AL592284.1-1:6      | 2.31        | Upregulated in monosomy 7 |
| CUST_8920_PI427704219  | lnc-FGF9-1            | lnc-FGF9-1:1            | 2.31        | Upregulated in monosomy 7 |
| CUST_17225_PI427704219 | lnc-ZNF705D-3         | lnc-ZNF705D-3:1         | 2.07        | Upregulated in monosomy 7 |
| CUST_8669_PI427704219  | lnc-ANKRD27-5         | lnc-ANKRD27-5:2         | 2.05        | Upregulated in monosomy 7 |
| CUST_3295_PI427704219  | lnc-SLC24A3-1         | lnc-SLC24A3-1:3         | 2.06        | Upregulated in monosomy 7 |
| CUST_1682_PI427704219  | lnc-KRT80-4           | lnc-KRT80-4:2           | 2.11        | Upregulated in monosomy 7 |
| CUST_10400_PI427704219 | lnc-SEPT9-3           | lnc-SEPT9-3:4           | 2.20        | Upregulated in monosomy 7 |
| CUST_18768_PI427704219 | lnc-ZC3H12B-2         | lnc-ZC3H12B-2:2         | 2.78        | Upregulated in monosomy 7 |
| CUST_15563_PI427704219 | lnc-BHLHE41-2         | lnc-BHLHE41-2:8         | 2.05        | Upregulated in monosomy 7 |
| CUST_22250_PI427704219 | lnc-IL17RA-2          | lnc-IL17RA-2:1          | 2.28        | Upregulated in monosomy 7 |
| CUST_6794_PI427704219  | lnc-USP25-3           | lnc-USP25-3:1           | 2.16        | Upregulated in monosomy 7 |
| CUST_7227_PI427704219  | lnc-EFCAB1-4          | lnc-EFCAB1-4:1          | 2.17        | Upregulated in monosomy 7 |
| CUST_22026_PI427704219 | lnc-OR4M2-7           | lnc-OR4M2-7:1           | 4.32        | Upregulated in monosomy 7 |
| CUST_6515_PI427704219  | lnc-SEPT9-3           | lnc-SEPT9-3:5           | 2.16        | Upregulated in monosomy 7 |
| CUST_16106_PI427704219 | lnc-TMEM75-3          | lnc-TMEM75-3:3          | 2.35        | Upregulated in monosomy 7 |
| CUST_4703_PI427704219  | lnc-ATP6V0D2-2        | lnc-ATP6V0D2-2:1        | 2.46        | Upregulated in monosomy 7 |
| CUST_16602_PI427704219 | lnc-TMEM18-12         | lnc-TMEM18-12:1         | 2.14        | Upregulated in monosomy 7 |
| A_33_P3302205          | lnc-SERAC1-1          | lnc-SERAC1-1:1          | 2.13        | Upregulated in monosomy 7 |

***Differential expressed lncRNAs between JMML patients with and without PTPN11 mutations***

| Probe_Name             | Gene_Name      | Transcript       | Fold change | Direction                                |
|------------------------|----------------|------------------|-------------|------------------------------------------|
| CUST_2836_PI427704219  | lnc-CTDSP2-2   | lnc-CTDSP2-2:4   | 2.96        | Upregulated in PTPN11 mutated patients   |
| CUST_5070_PI427704219  | lnc-OR10H5-2   | lnc-OR10H5-2:4   | 3.01        | Upregulated in PTPN11 mutated patients   |
| CUST_15107_PI427704219 | lnc-SCCPDH-1   | lnc-SCCPDH-1:8   | 2.38        | Upregulated in PTPN11 mutated patients   |
| CUST_21534_PI427704219 | lnc-DLK1-8     | lnc-DLK1-8:6     | 2.28        | Upregulated in PTPN11 mutated patients   |
| CUST_7509_PI427704219  | lnc-KCNJ9-2    | lnc-KCNJ9-2:1    | 2.65        | Upregulated in PTPN11 mutated patients   |
| CUST_13759_PI427704219 | lnc-KIAA0226-3 | lnc-KIAA0226-3:3 | 2.23        | Upregulated in PTPN11 mutated patients   |
| CUST_12368_PI427704219 | lnc-SH2B3-1    | lnc-SH2B3-1:3    | 2.46        | downregulated in PTPN11 mutated patients |

|                       |              |                |      |                                          |
|-----------------------|--------------|----------------|------|------------------------------------------|
| CUST_8078_PI427704219 | lnc-HAPLN1-1 | lnc-HAPLN1-1:1 | 2.00 | downregulated in PTPN11 mutated patients |
|-----------------------|--------------|----------------|------|------------------------------------------|

**Differential expressed lncRNAs between JMML patients with and without KRAS mutations**

| Probe_Name             | Gene_Name            | Transcript             | Fold change | Direction                              |
|------------------------|----------------------|------------------------|-------------|----------------------------------------|
| CUST_18292_PI427704219 | lnc-C2orf54-1        | lnc-C2orf54-1:2        | 4.35        | Upregulated in KRAS mutated patients   |
| CUST_22691_PI427704219 | lnc-CDYL-3           | lnc-CDYL-3:1           | 2.07        | Upregulated in KRAS mutated patients   |
| CUST_21800_PI427704219 | lnc-FAM83A-1         | lnc-FAM83A-1:1         | 2.14        | Upregulated in KRAS mutated patients   |
| CUST_14242_PI427704219 | lnc-ATXN7L3B-2       | lnc-ATXN7L3B-2:2       | 2.06        | Upregulated in KRAS mutated patients   |
| CUST_7287_PI427704219  | lnc-RAPGEF2-2        | lnc-RAPGEF2-2:1        | 2.15        | Upregulated in KRAS mutated patients   |
| CUST_8833_PI427704219  | lnc-RXFP3-1          | lnc-RXFP3-1:1          | 2.02        | Upregulated in KRAS mutated patients   |
| A_33_P3391736          | lnc-ZCCHC7-3         | lnc-ZCCHC7-3:1         | 2.16        | Upregulated in KRAS mutated patients   |
| CUST_5785_PI427704219  | lnc-CEP44-4          | lnc-CEP44-4:1          | 2.48        | Upregulated in KRAS mutated patients   |
| CUST_7476_PI427704219  | lnc-PKDCC-2          | lnc-PKDCC-2:4          | 2.22        | Upregulated in KRAS mutated patients   |
| CUST_2725_PI427704219  | lnc-CCT8-1           | lnc-CCT8-1:1           | 2.12        | Upregulated in KRAS mutated patients   |
| CUST_8855_PI427704219  | lnc-ILK-3            | lnc-ILK-3:1            | 2.11        | Upregulated in KRAS mutated patients   |
| CUST_14152_PI427704219 | lnc-RP11-10A14.4.1-4 | lnc-RP11-10A14.4.1-4:4 | 2.90        | Upregulated in KRAS mutated patients   |
| CUST_13648_PI427704219 | lnc-LMX1A-2          | lnc-LMX1A-2:1          | 2.07        | Upregulated in KRAS mutated patients   |
| CUST_8840_PI427704219  | lnc-ZNF583-1         | lnc-ZNF583-1:7         | 2.40        | Upregulated in KRAS mutated patients   |
| CUST_22789_PI427704219 | lnc-KCNG3-1          | lnc-KCNG3-1:2          | 2.19        | Upregulated in KRAS mutated patients   |
| CUST_14756_PI427704219 | lnc-CCDC152-1        | lnc-CCDC152-1:1        | 2.36        | Upregulated in KRAS mutated patients   |
| CUST_17506_PI427704219 | lnc-KCNC2-2          | lnc-KCNC2-2:4          | 2.01        | Upregulated in KRAS mutated patients   |
| CUST_13579_PI427704219 | lnc-THADA-4          | lnc-THADA-4:1          | 5.74        | Downregulated in KRAS mutated patients |
| CUST_7375_PI427704219  | lnc-THADA-4          | lnc-THADA-4:3          | 4.06        | Downregulated in KRAS mutated patients |
| CUST_15107_PI427704219 | lnc-SCCPDH-1         | lnc-SCCPDH-1:8         | 3.31        | Downregulated in KRAS mutated patients |
| CUST_21418_PI427704219 | lnc-CXCR3-4          | lnc-CXCR3-4:2          | 2.14        | Downregulated in KRAS mutated patients |
| CUST_9738_PI427704219  | lnc-RBM48-1          | lnc-RBM48-1:4          | 3.05        | Downregulated in KRAS mutated patients |
| CUST_10895_PI427704219 | lnc-RBM48-1          | lnc-RBM48-1:3          | 2.92        | Downregulated in KRAS mutated patients |
| CUST_3789_PI427704219  | lnc-C5orf39-1        | lnc-C5orf39-1:10       | 2.63        | Downregulated in KRAS mutated patients |
| A_33_P3308481          | HYMAI                | HYMAI                  | 2.22        | Downregulated in KRAS mutated patients |
| A_33_P3318763          | lnc-RBM48-1          | lnc-RBM48-1:2          | 2.97        | Downregulated in KRAS mutated patients |

**Differential expressed lncRNAs between JMML patients with and without NRAS mutations**

| Probe_Name             | Gene_Name    | Transcript     | Fold change | Direction                            |
|------------------------|--------------|----------------|-------------|--------------------------------------|
| CUST_18894_PI427704219 | lnc-GNAO1-1  | lnc-GNAO1-1:1  | 2.40        | Upregulated in NRAS mutated patients |
| CUST_6139_PI427704219  | lnc-FABP5-2  | lnc-FABP5-2:2  | 2.37        | Upregulated in NRAS mutated patients |
| CUST_11279_PI427704219 | lnc-RBM19-1  | lnc-RBM19-1:7  | 2.01        | Upregulated in NRAS mutated patients |
| CUST_10729_PI427704219 | lnc-TUBA3C-1 | lnc-TUBA3C-1:1 | 2.93        | Upregulated in NRAS mutated patients |

**Differential expressed lncRNAs between JMML patients with and without NF1 mutations**

| Probe_Name             | Gene_Name            | Transcript             | Fold change | Direction                             |
|------------------------|----------------------|------------------------|-------------|---------------------------------------|
| CUST_17716_PI427704219 | lnc-MCTP2-7          | lnc-MCTP2-7:1          | 17.56       | downregulated in NF1 mutated patients |
| CUST_20459_PI427704219 | lnc-ZG16-3           | lnc-ZG16-3:1           | 12.90       | downregulated in NF1 mutated patients |
| CUST_12374_PI427704219 | lnc-ANKRD30A-7       | lnc-ANKRD30A-7:1       | 12.52       | downregulated in NF1 mutated patients |
| CUST_9166_PI427704219  | lnc-GABARAPL3-1      | lnc-GABARAPL3-1:1      | 11.88       | downregulated in NF1 mutated patients |
| A_33_P3281036          | HCG11                | HCG11                  | 11.10       | downregulated in NF1 mutated patients |
| CUST_13230_PI427704219 | lnc-SGCG-3           | lnc-SGCG-3:1           | 10.76       | downregulated in NF1 mutated patients |
| CUST_9207_PI427704219  | lnc-HMGNA4-1         | lnc-HMGNA4-1:1         | 10.50       | downregulated in NF1 mutated patients |
| CUST_22026_PI427704219 | lnc-OR4M2-7          | lnc-OR4M2-7:1          | 10.49       | downregulated in NF1 mutated patients |
| CUST_21269_PI427704219 | lnc-SERPINC1-1       | lnc-SERPINC1-1:7       | 10.28       | downregulated in NF1 mutated patients |
| CUST_17847_PI427704219 | lnc-ADARB1-3         | lnc-ADARB1-3:12        | 9.72        | downregulated in NF1 mutated patients |
| CUST_20089_PI427704219 | lnc-SMUG1-7          | lnc-SMUG1-7:1          | 9.32        | downregulated in NF1 mutated patients |
| CUST_10191_PI427704219 | lnc-DNASE1L3-1       | lnc-DNASE1L3-1:1       | 9.29        | downregulated in NF1 mutated patients |
| CUST_22391_PI427704219 | lnc-CHODL-1          | lnc-CHODL-1:1          | 8.99        | downregulated in NF1 mutated patients |
| CUST_15349_PI427704219 | lnc-ALDH1A3-1        | lnc-ALDH1A3-1:1        | 8.41        | downregulated in NF1 mutated patients |
| A_33_P3231923          | lnc-VRK2-6           | lnc-VRK2-6:1           | 7.56        | downregulated in NF1 mutated patients |
| CUST_12713_PI427704219 | lnc-VRK2-5           | lnc-VRK2-5:5           | 7.25        | downregulated in NF1 mutated patients |
| CUST_22847_PI427704219 | lnc-USP16-5          | lnc-USP16-5:1          | 7.25        | downregulated in NF1 mutated patients |
| CUST_1340_PI427704219  | lnc-NBPF20-1         | lnc-NBPF20-1:1         | 7.08        | downregulated in NF1 mutated patients |
| CUST_7661_PI427704219  | lnc-USP25-2          | lnc-USP25-2:8          | 7.01        | downregulated in NF1 mutated patients |
| CUST_17748_PI427704219 | lnc-ERLIN2-1         | lnc-ERLIN2-1:1         | 6.60        | downregulated in NF1 mutated patients |
| CUST_9189_PI427704219  | lnc-TIGIT-2          | lnc-TIGIT-2:5          | 6.47        | downregulated in NF1 mutated patients |
| CUST_17279_PI427704219 | lnc-FAM83B-2         | lnc-FAM83B-2:1         | 6.07        | downregulated in NF1 mutated patients |
| CUST_2876_PI427704219  | lnc-COL4A1-1         | lnc-COL4A1-1:1         | 5.95        | downregulated in NF1 mutated patients |
| CUST_4141_PI427704219  | lnc-OR4M2-2          | lnc-OR4M2-2:1          | 5.86        | downregulated in NF1 mutated patients |
| CUST_13615_PI427704219 | lnc-FLRT2-2          | lnc-FLRT2-2:9          | 5.76        | downregulated in NF1 mutated patients |
| CUST_4747_PI427704219  | lnc-DEA-1            | lnc-DEA-1:1            | 5.25        | downregulated in NF1 mutated patients |
| CUST_14959_PI427704219 | lnc-FGF9-3           | lnc-FGF9-3:4           | 5.24        | downregulated in NF1 mutated patients |
| CUST_10790_PI427704219 | lnc-TOMM20-2         | lnc-TOMM20-2:9         | 5.14        | downregulated in NF1 mutated patients |
| CUST_3980_PI427704219  | lnc-PMEL-1           | lnc-PMEL-1:1           | 5.14        | downregulated in NF1 mutated patients |
| CUST_3500_PI427704219  | lnc-PCF11-1          | lnc-PCF11-1:5          | 5.08        | downregulated in NF1 mutated patients |
| CUST_18421_PI427704219 | lnc-RP11-43D2.2.1-10 | lnc-RP11-43D2.2.1-10:1 | 4.94        | downregulated in NF1 mutated patients |
| CUST_4758_PI427704219  | lnc-CHL1-1           | lnc-CHL1-1:2           | 4.89        | downregulated in NF1 mutated patients |
| A_33_P3295543          | lnc-AC110373.1-6     | lnc-AC110373.1-6:1     | 4.75        | downregulated in NF1 mutated patients |
| CUST_15210_PI427704219 | lnc-SFT2D3-1         | lnc-SFT2D3-1:1         | 4.74        | downregulated in NF1 mutated patients |
| CUST_22931_PI427704219 | lnc-MPHOSPH6-2       | lnc-MPHOSPH6-2:2       | 4.68        | downregulated in NF1 mutated patients |
| CUST_10965_PI427704219 | lnc-KIAA1239-2       | lnc-KIAA1239-2:1       | 4.61        | downregulated in NF1 mutated patients |
| CUST_16890_PI427704219 | lnc-NFRKB-1          | lnc-NFRKB-1:1          | 4.54        | downregulated in NF1 mutated patients |
| CUST_1642_PI427704219  | lnc-ARHGEF7-2        | lnc-ARHGEF7-2:1        | 4.51        | downregulated in NF1 mutated patients |
| CUST_1667_PI427704219  | lnc-NMNAT2-3         | lnc-NMNAT2-3:1         | 4.40        | downregulated in NF1 mutated patients |
| CUST_6893_PI427704219  | lnc-ZPLD1-1          | lnc-ZPLD1-1:1          | 4.35        | downregulated in NF1 mutated patients |
| CUST_8897_PI427704219  | lnc-OXCT1-1          | lnc-OXCT1-1:8          | 4.32        | downregulated in NF1 mutated patients |

|                        |                       |                         |      |                                       |
|------------------------|-----------------------|-------------------------|------|---------------------------------------|
| CUST_14772_PI427704219 | lnc-FAM70A-1          | lnc-FAM70A-1:8          | 4.27 | downregulated in NF1 mutated patients |
| CUST_2103_PI427704219  | lnc-LRRC4C-3          | lnc-LRRC4C-3:2          | 4.25 | downregulated in NF1 mutated patients |
| CUST_19174_PI427704219 | lnc-DSCR8-1           | lnc-DSCR8-1:2           | 4.15 | downregulated in NF1 mutated patients |
| CUST_849_PI427704219   | lnc-GLUD1-4           | lnc-GLUD1-4:4           | 4.14 | downregulated in NF1 mutated patients |
| CUST_10120_PI427704219 | lnc-NAV3-1            | lnc-NAV3-1:10           | 4.04 | downregulated in NF1 mutated patients |
| CUST_22091_PI427704219 | lnc-LARGE-1           | lnc-LARGE-1:3           | 3.83 | downregulated in NF1 mutated patients |
| CUST_14984_PI427704219 | lnc-IGFBP1-5          | lnc-IGFBP1-5:1          | 3.77 | downregulated in NF1 mutated patients |
| CUST_11154_PI427704219 | lnc-EGFL6-2           | lnc-EGFL6-2:1           | 3.70 | downregulated in NF1 mutated patients |
| CUST_2777_PI427704219  | lnc-USP35-1           | lnc-USP35-1:6           | 3.45 | downregulated in NF1 mutated patients |
| CUST_5289_PI427704219  | lnc-CHST8-1           | lnc-CHST8-1:1           | 3.36 | downregulated in NF1 mutated patients |
| CUST_6177_PI427704219  | lnc-AC112715.2.1-3    | lnc-AC112715.2.1-3:1    | 3.25 | downregulated in NF1 mutated patients |
| CUST_20248_PI427704219 | lnc-GPAT2-1           | lnc-GPAT2-1:1           | 2.95 | downregulated in NF1 mutated patients |
| CUST_12181_PI427704219 | lnc-RP3-377D14.1.1-3  | lnc-RP3-377D14.1.1-3:12 | 2.73 | downregulated in NF1 mutated patients |
| CUST_5014_PI427704219  | lnc-RP11-210M15.2.1-1 | lnc-RP11-210M15.2.1-1:1 | 2.69 | downregulated in NF1 mutated patients |
| CUST_3424_PI427704219  | lnc-DIRAS2-2          | lnc-DIRAS2-2:2          | 2.63 | downregulated in NF1 mutated patients |
| CUST_5840_PI427704219  | lnc-MORF4L1-1         | lnc-MORF4L1-1:1         | 2.52 | downregulated in NF1 mutated patients |
| CUST_7303_PI427704219  | lnc-UMODL1-1          | lnc-UMODL1-1:2          | 2.49 | downregulated in NF1 mutated patients |
| CUST_6725_PI427704219  | lnc-BCL2A1-1          | lnc-BCL2A1-1:1          | 2.32 | downregulated in NF1 mutated patients |
| CUST_10534_PI427704219 | lnc-ATP6AP2-2         | lnc-ATP6AP2-2:1         | 2.27 | downregulated in NF1 mutated patients |
| CUST_3101_PI427704219  | lnc-KIF20B-1          | lnc-KIF20B-1:1          | 2.27 | downregulated in NF1 mutated patients |
| CUST_5699_PI427704219  | lnc-MARCH4-2          | lnc-MARCH4-2:4          | 2.05 | downregulated in NF1 mutated patients |

**Differential expressed lncRNAs between JMML patients without mutations (quadruple negative) and with mutations**

| Probe_Name            | Gene_Name    | Transcript     | Fold change | Direction                                  |
|-----------------------|--------------|----------------|-------------|--------------------------------------------|
| CUST_6197_PI427704219 | lnc-ATP10A-2 | lnc-ATP10A-2:2 | 14.39       | upregulated in quadruple negative patients |

**Differential expressed lncRNAs between JMML patients with and without LIN28B overexpression**

| Probe_Name             | Gene_Name             | Transcript              | Fold change | Direction                            |
|------------------------|-----------------------|-------------------------|-------------|--------------------------------------|
| CUST_15547_PI427704219 | lnc-KCNA5-2           | lnc-KCNA5-2:1           | 6.83        | upregulated in LIN28B overexpression |
| CUST_3116_PI427704219  | lnc-MDGA2-2           | lnc-MDGA2-2:1           | 4.24        | upregulated in LIN28B overexpression |
| CUST_6144_PI427704219  | lnc-IFITM2-4          | lnc-IFITM2-4:1          | 4.01        | upregulated in LIN28B overexpression |
| CUST_12720_PI427704219 | lnc-PCDH10-6          | lnc-PCDH10-6:1          | 3.46        | upregulated in LIN28B overexpression |
| CUST_17041_PI427704219 | lnc-NUDCD2-5          | lnc-NUDCD2-5:1          | 3.20        | upregulated in LIN28B overexpression |
| CUST_4950_PI427704219  | lnc-MECR-2            | lnc-MECR-2:1            | 3.00        | upregulated in LIN28B overexpression |
| CUST_19075_PI427704219 | lnc-DLK1-6 (MEG8)     | lnc-DLK1-6:9            | 2.99        | upregulated in LIN28B overexpression |
| CUST_9091_PI427704219  | lnc-FGGY-3            | lnc-FGGY-3:1            | 2.80        | upregulated in LIN28B overexpression |
| CUST_8964_PI427704219  | lnc-IFITM2-3          | lnc-IFITM2-3:3          | 2.78        | upregulated in LIN28B overexpression |
| CUST_9920_PI427704219  | lnc-RAD23B-8          | lnc-RAD23B-8:1          | 2.56        | upregulated in LIN28B overexpression |
| CUST_9991_PI427704219  | lnc-EPST11-3          | lnc-EPST11-3:2          | 2.48        | upregulated in LIN28B overexpression |
| CUST_779_PI427704219   | lnc-RP11-770G2.3.1-2  | lnc-RP11-770G2.3.1-2:1  | 2.45        | upregulated in LIN28B overexpression |
| CUST_19560_PI427704219 | lnc-REG1B-4           | lnc-REG1B-4:1           | 2.43        | upregulated in LIN28B overexpression |
| A_33_P3352843          | lnc-DRD5-1            | lnc-DRD5-1:1            | 2.39        | upregulated in LIN28B overexpression |
| CUST_15377_PI427704219 | lnc-USP41-1           | lnc-USP41-1:3           | 2.38        | upregulated in LIN28B overexpression |
| CUST_1967_PI427704219  | lnc-CCDC33-1          | lnc-CCDC33-1:4          | 2.36        | upregulated in LIN28B overexpression |
| CUST_21534_PI427704219 | lnc-DLK1-8 (MEG8)     | lnc-DLK1-8:6            | 2.33        | upregulated in LIN28B overexpression |
| CUST_14852_PI427704219 | lnc-EBF3-6            | lnc-EBF3-6:1            | 2.32        | upregulated in LIN28B overexpression |
| CUST_21215_PI427704219 | lnc-C8orf22-2         | lnc-C8orf22-2:2         | 2.25        | upregulated in LIN28B overexpression |
| CUST_2867_PI427704219  | lnc-F8A2-1            | lnc-F8A2-1:2            | 2.25        | upregulated in LIN28B overexpression |
| CUST_21827_PI427704219 | lnc-TMTC3-5           | lnc-TMTC3-5:1           | 2.21        | upregulated in LIN28B overexpression |
| CUST_3317_PI427704219  | lnc-PTPRC-2           | lnc-PTPRC-2:1           | 2.20        | upregulated in LIN28B overexpression |
| CUST_6947_PI427704219  | lnc-DLK1-4 (MEG3)     | lnc-DLK1-4:28           | 2.19        | upregulated in LIN28B overexpression |
| CUST_16603_PI427704219 | lnc-AC091435.1-2      | lnc-AC091435.1-2:1      | 2.16        | upregulated in LIN28B overexpression |
| CUST_17150_PI427704219 | lnc-AGPAT2-2          | lnc-AGPAT2-2:2          | 2.15        | upregulated in LIN28B overexpression |
| CUST_18129_PI427704219 | lnc-GALC-2            | lnc-GALC-2:1            | 2.13        | upregulated in LIN28B overexpression |
| CUST_15705_PI427704219 | lnc-IGF1R-1           | lnc-IGF1R-1:1           | 2.10        | upregulated in LIN28B overexpression |
| A_33_P3399428          | lnc-AL035696.1-1      | lnc-AL035696.1-1:1      | 2.06        | upregulated in LIN28B overexpression |
| CUST_5517_PI427704219  | lnc-RP11-43D2.2.1-13  | lnc-RP11-43D2.2.1-13:1  | 2.03        | upregulated in LIN28B overexpression |
| CUST_15768_PI427704219 | lnc-SRD5A1-1          | lnc-SRD5A1-1:3          | 2.00        | upregulated in LIN28B overexpression |
| CUST_19284_PI427704219 | lnc-VRK2-5            | lnc-VRK2-5:5            | 1.98        | upregulated in LIN28B overexpression |
| CUST_21734_PI427704219 | lnc-CLDN6-1           | lnc-CLDN6-1:1           | 1.98        | upregulated in LIN28B overexpression |
| CUST_1926_PI427704219  | lnc-MYO16-1           | lnc-MYO16-1:2           | 1.97        | upregulated in LIN28B overexpression |
| CUST_10174_PI427704219 | lnc-TMSB4X-1          | lnc-TMSB4X-1:1          | 1.97        | upregulated in LIN28B overexpression |
| CUST_9357_PI427704219  | lnc-RP11-82I10.1.1-10 | lnc-RP11-82I10.1.1-10:1 | 1.95        | upregulated in LIN28B overexpression |
| CUST_8854_PI427704219  | lnc-EEA1-1            | lnc-EEA1-1:1            | 1.94        | upregulated in LIN28B overexpression |
| CUST_14156_PI427704219 | lnc-SLC16A9-1         | lnc-SLC16A9-1:1         | 1.92        | upregulated in LIN28B overexpression |
| CUST_13530_PI427704219 | lnc-HACE1-3           | lnc-HACE1-3:1           | 1.92        | upregulated in LIN28B overexpression |
| CUST_4067_PI427704219  | lnc-KCNIP1-1          | lnc-KCNIP1-1:1          | 1.91        | upregulated in LIN28B overexpression |
| CUST_7281_PI427704219  | lnc-RHBG-1            | lnc-RHBG-1:1            | 1.90        | upregulated in LIN28B overexpression |
| CUST_15506_PI427704219 | lnc-HEATR2-1          | lnc-HEATR2-1:1          | 1.90        | upregulated in LIN28B overexpression |
| CUST_1427_PI427704219  | lnc-TSC22D1-2         | lnc-TSC22D1-2:1         | 1.90        | upregulated in LIN28B overexpression |
| CUST_11706_PI427704219 | lnc-DAPK2-1           | lnc-DAPK2-1:1           | 1.86        | upregulated in LIN28B overexpression |
| CUST_21543_PI427704219 | lnc-AC009113.1-1      | lnc-AC009113.1-1:1      | 1.82        | upregulated in LIN28B overexpression |
| CUST_7087_PI427704219  | lnc-GBP6-1            | lnc-GBP6-1:1            | 1.76        | upregulated in LIN28B overexpression |
| CUST_3487_PI427704219  | lnc-SERPINB6-2        | lnc-SERPINB6-2:1        | 1.76        | upregulated in LIN28B overexpression |
| CUST_9703_PI427704219  | lnc-COL1A1-3          | lnc-COL1A1-3:1          | 1.74        | upregulated in LIN28B overexpression |
| CUST_14619_PI427704219 | lnc-BTBD10-3          | lnc-BTBD10-3:8          | 1.74        | upregulated in LIN28B overexpression |
| CUST_18645_PI427704219 | lnc-GLRX3-1           | lnc-GLRX3-1:1           | 1.72        | upregulated in LIN28B overexpression |
| CUST_13120_PI427704219 | lnc-TNFRSF14-1        | lnc-TNFRSF14-1:1        | 1.65        | upregulated in LIN28B overexpression |
| CUST_11428_PI427704219 | lnc-CLIC5-1           | lnc-CLIC5-1:1           | 1.64        | upregulated in LIN28B overexpression |
| CUST_7038_PI427704219  | lnc-CCDC63-2          | lnc-CCDC63-2:1          | 1.62        | upregulated in LIN28B overexpression |
| CUST_11811_PI427704219 | lnc-RBMY1B-1          | lnc-RBMY1B-1:1          | 1.60        | upregulated in LIN28B overexpression |

|                        |                |                  |      |                                               |
|------------------------|----------------|------------------|------|-----------------------------------------------|
| CUST_1600_PI427704219  | lnc-B3GAT2-3   | lnc-B3GAT2-3:5   | 1.59 | upregulated in <i>LIN28B</i> overexpression   |
| CUST_3869_PI427704219  | lnc-ZNF792-1   | lnc-ZNF792-1:1   | 1.57 | upregulated in <i>LIN28B</i> overexpression   |
| CUST_3034_PI427704219  | lnc-PPM1M-2    | lnc-PPM1M-2:1    | 1.57 | upregulated in <i>LIN28B</i> overexpression   |
| CUST_4376_PI427704219  | lnc-MTIF3-1    | lnc-MTIF3-1:1    | 1.51 | upregulated in <i>LIN28B</i> overexpression   |
| CUST_5941_PI427704219  | lnc-MBOAT1-1   | lnc-MBOAT1-1:1   | 1.50 | upregulated in <i>LIN28B</i> overexpression   |
| CUST_12699_PI427704219 | lnc-POU5F1B-3  | lnc-POU5F1B-3:2  | 1.46 | upregulated in <i>LIN28B</i> overexpression   |
| CUST_177_PI427704219   | lnc-SPAG16-4   | lnc-SPAG16-4:4   | 1.44 | upregulated in <i>LIN28B</i> overexpression   |
| CUST_4703_PI427704219  | lnc-ATP6V0D2-2 | lnc-ATP6V0D2-2:1 | 1.49 | downregulated in <i>LIN28B</i> overexpression |

**Table S6. Univariate cox-regression analysis identified 45 individual lncRNAs highly associated with OS (P < 0.001) of which 7 remained significantly associated with OS after multivariate cox-regression analysis**

| Probe_Name             | Gene_Name             | Transcript              | Univariable analysis P value | Hazard Ratio | Multivariable analysis P value | multivariable cox regression coefficient |
|------------------------|-----------------------|-------------------------|------------------------------|--------------|--------------------------------|------------------------------------------|
| CUST_7072_PI427704219  | lnc-EMB-3             | lnc-EMB-3:1             | 0.0009695                    | 3.30         | 0.00022                        | 3.34                                     |
| CUST_23004_PI427704219 | lnc-NPFFR2-1          | lnc-NPFFR2-1:1          | 2.98E-05                     | 0.06         | 0.000312                       | -3.91                                    |
| A_33_P3356004          | UCKL1-AS1             | UCKL1-AS1               | 0.0004982                    | 5.88         | 0.00033                        | 3.46                                     |
| CUST_18306_PI427704219 | lnc-RORB-1            | lnc-RORB-1:1            | 0.000244                     | 4.15         | 0.000356                       | 2.35                                     |
| CUST_8799_PI427704219  | lnc-CCDC90A-2         | lnc-CCDC90A-2:1         | 0.0003824                    | 0.18         | 0.000382                       | -2.73                                    |
| CUST_17294_PI427704219 | lnc-ZSWIM2-3          | lnc-ZSWIM2-3:2          | 0.0008804                    | 0.34         | 0.00043                        | -1.98                                    |
| CUST_10195_PI427704219 | lnc-GPR63-5           | lnc-GPR63-5:1           | 0.000539                     | 0.20         | 0.000483                       | -3.91                                    |
| CUST_14454_PI427704219 | lnc-LTBP3-2           | lnc-LTBP3-2:2           | 0.0002794                    | 2.17         | 0.001125                       | 1.66                                     |
| CUST_2165_PI427704219  | lnc-AC092329.1-1      | lnc-AC092329.1-1:7      | 0.0005124                    | 0.36         | 0.001271                       | -1.74                                    |
| CUST_22423_PI427704219 | lnc-ADAMTS18-1        | lnc-ADAMTS18-1:1        | 0.0007328                    | 4.95         | 0.0014                         | 2.75                                     |
| CUST_11044_PI427704219 | lnc-LGALS12-1         | lnc-LGALS12-1:1         | 0.000685                     | 3.20         | 0.002                          | 2.07                                     |
| CUST_20656_PI427704219 | lnc-SSPN-2            | lnc-SSPN-2:1            | 0.0003888                    | 0.20         | 0.002                          | -2.02                                    |
| CUST_6103_PI427704219  | lnc-RBFA-1            | lnc-RBFA-1:6            | 0.0008208                    | 2.04         | 0.002                          | 1.04                                     |
| CUST_6951_PI427704219  | lnc-LTBP3-2           | lnc-LTBP3-2:1           | 0.0002415                    | 2.17         | 0.002                          | 1.66                                     |
| CUST_18748_PI427704219 | lnc-ZNF705A-3         | lnc-ZNF705A-3:1         | 0.0001577                    | 0.18         | 0.003                          | -2.42                                    |
| CUST_6691_PI427704219  | lnc-DLX2-4            | lnc-DLX2-4:3            | 0.0002644                    | 4.18         | 0.004                          | 1.92                                     |
| CUST_9721_PI427704219  | lnc-CCDC54-2          | lnc-CCDC54-2:13         | 0.0007596                    | 0.10         | 0.004                          | -4.59                                    |
| CUST_11426_PI427704219 | lnc-C10orf122-1       | lnc-C10orf122-1:8       | 0.0002535                    | 0.19         | 0.005                          | -2.12                                    |
| CUST_15250_PI427704219 | lnc-MAP3K9-1          | lnc-MAP3K9-1:1          | 0.0009221                    | 2.87         | 0.005                          | 1.56                                     |
| CUST_16645_PI427704219 | lnc-MAGOHB-1          | lnc-MAGOHB-1:1          | 6.86E-05                     | 0.12         | 0.005                          | -2.90                                    |
| CUST_19983_PI427704219 | lnc-SLC39A11-1        | lnc-SLC39A11-1:9        | 0.0007306                    | 6.48         | 0.005                          | 2.33                                     |
| CUST_4074_PI427704219  | lnc-CHD9-3            | lnc-CHD9-3:2            | 0.0003856                    | 0.09         | 0.005                          | -4.25                                    |
| CUST_15563_PI427704219 | lnc-BHLHE41-2         | lnc-BHLHE41-2:8         | 3.00E-04                     | 0.33         | 0.006                          | -1.22                                    |
| CUST_17494_PI427704219 | lnc-CTD-2215E18.1.1-3 | lnc-CTD-2215E18.1.1-3:2 | 0.0007635                    | 0.17         | 0.006                          | -2.16                                    |
| CUST_3967_PI427704219  | lnc-AP002478.1-5      | lnc-AP002478.1-5:4      | 0.0005319                    | 0.34         | 0.006                          | -1.48                                    |
| CUST_12049_PI427704219 | lnc-ZNF621-1          | lnc-ZNF621-1:1          | 0.000724                     | 0.20         | 0.007                          | -2.16                                    |
| CUST_11202_PI427704219 | lnc-KPNA4-1           | lnc-KPNA4-1:1           | 0.0006298                    | 0.19         | 0.008                          | -2.01                                    |
| CUST_12064_PI427704219 | lnc-ADAM10-1          | lnc-ADAM10-1:1          | 0.0001414                    | 0.14         | 0.009                          | -2.01                                    |
| CUST_2532_PI427704219  | lnc-TM4SF20-1         | lnc-TM4SF20-1:2         | 0.0002587                    | 0.19         | 0.013                          | -3.06                                    |
| CUST_2736_PI427704219  | lnc-SUCLA2-2          | lnc-SUCLA2-2:1          | 0.0006559                    | 0.12         | 0.013                          | -2.48                                    |
| CUST_21428_PI427704219 | lnc-TSPAN1-1          | lnc-TSPAN1-1:1          | 0.0009304                    | 0.11         | 0.016                          | -1.96                                    |
| CUST_6330_PI427704219  | lnc-PRDM11-3          | lnc-PRDM11-3:5          | 0.0007775                    | 0.26         | 0.018                          | -1.40                                    |
| CUST_15280_PI427704219 | lnc-ZNF146-1          | lnc-ZNF146-1:3          | 0.0004744                    | 0.22         | 0.024                          | -1.96                                    |
| CUST_21120_PI427704219 | lnc-ILKAP-1           | lnc-ILKAP-1:1           | 0.0005869                    | 6.56         | 0.038                          | 1.59                                     |
| CUST_9418_PI427704219  | lnc-CAMK1G-5          | lnc-CAMK1G-5:4          | 0.0007238                    | 0.21         | 0.046                          | -1.97                                    |
| CUST_11683_PI427704219 | lnc-CSF1-2            | lnc-CSF1-2:1            | 0.0005065                    | 0.10         | 0.05                           | -2.18                                    |
| CUST_8316_PI427704219  | lnc-IRX3-4            | lnc-IRX3-4:17           | 0.0009392                    | 0.19         | 0.056                          | -2.21                                    |
| CUST_198_PI427704219   | lnc-SLC25A26-3        | lnc-SLC25A26-3:1        | 0.0009091                    | 0.25         | 0.061                          | -1.88                                    |
| CUST_19807_PI427704219 | lnc-HNRNPC-1          | lnc-HNRNPC-1:2          | 0.0008673                    | 0.44         | 0.064                          | -0.70                                    |
| CUST_15679_PI427704219 | lnc-PACRGL-2          | lnc-PACRGL-2:1          | 0.0009861                    | 0.22         | 0.065                          | -1.55                                    |
| CUST_19636_PI427704219 | lnc-CPEB4-6           | lnc-CPEB4-6:1           | 0.0009302                    | 0.17         | 0.07                           | -1.70                                    |
| CUST_4180_PI427704219  | lnc-MEF2A-1           | lnc-MEF2A-1:1           | 0.0008235                    | 0.36         | 0.077                          | -1.06                                    |
| CUST_12140_PI427704219 | lnc-GNG11-2           | lnc-GNG11-2:2           | 0.0006439                    | 0.23         | 0.098                          | -1.44                                    |
| CUST_1378_PI427704219  | lnc-FGF10-3           | lnc-FGF10-3:4           | 0.0005511                    | 0.09         | 0.103                          | -1.87                                    |
| CUST_6745_PI427704219  | lnc-CDC42EP1-1        | lnc-CDC42EP1-1:1        | 0.0009891                    | 1.73         | 0.138                          | 0.86                                     |
