# Supplementary material
Source: PubMed Central journal article supplement (PMC6278979)
Supplement: 2018_189977-Disclosures_and_Contributions.pdf [file 2018_189977-Disclosures_and_Contributions.pdf]

Haematologica  
HAEMATOL/2018/189977  
Version 3

The long non-coding RNA landscape in juvenile myelomonocytic  
leukemia

Mattias Hofmans, Tim Lammens, Hetty H Helsmoortel, Silvia Bresolin,  
Hélène Cavé, Christian Flotho, Henrik Hasle, Marry M. van den  
Heuvel-Eibrink, Charlotte Niemeyer, Jan Stary, Nadine Van Roy, Pieter  
Van Vlierberghe, Jan Philippé, and Barbara De Moerloose

Disclosures: This work was supported by the Foundation against Cancer (2016-113, BDM), the Cancer Plan, action 29 (KP\_29\_020, JP) and vzw Kinderkankerfonds, a non-profit childhood cancer foundation under Belgian law (grant to TL). MH is a PhD candidate at Ghent University and this work is submitted in partial fulfilment of the requirement for the PhD.

Contributions: MH wrote the manuscript. MH and HHL performed data analysis. HHL, TL and BDM designed the study. TL, JP and BDM supervised the study. SB, HC, CF, HH, MMvdH, CN, JS and BDM provided RNA from patients in the JMML cohort. NvR provided results from genetic testing. All authors read and approved the final version of the manuscript.
